# Supplementary material
Source: PubMed Central journal article supplement (PMC9908937)
Supplement: 41467_2023_36140_MOESM1_ESM.pdf [file 41467_2023_36140_MOESM1_ESM.pdf]

## Severe COVID-19 patients have impaired plasmacytoid dendritic cell-mediated control of SARS-CoV-2

Manon Venet<sup>1\*</sup>, Margarida Sa Ribeiro<sup>1\*</sup>, Elodie Décembre<sup>1\*</sup>, Alicia Bellomo<sup>1\*</sup>, Garima Joshi<sup>1</sup>, Célia Nuovo<sup>1</sup>, Marine Villard<sup>1</sup>, David Cluet<sup>2</sup>, Magali Perret<sup>1</sup>, Rémi Pescamona<sup>1</sup>, Helena Paidassi<sup>1</sup>, Thierry Walzer<sup>1</sup>, Omran Allatif<sup>1</sup>, Alexandre Belot<sup>1</sup>, Sophie Trouillet-Assant<sup>1</sup>, Emiliano P. Ricci<sup>2</sup>, and Marlène Dreux<sup>1,#</sup>

<sup>1</sup> CIRI, Inserm, U1111, Université Claude Bernard Lyon 1, CNRS, UMR5308, École Normale Supérieure de Lyon, Univ Lyon, F-69007, LYON, France

<sup>2</sup> Laboratory of Biology and Modeling of the Cell, Université de Lyon, ENS de Lyon, Université Claude Bernard, CNRS UMR 5239, Inserm U1293, Lyon, France.

# Corresponding author/lead contact; email: marlene.dreux@ens-lyon.fr, Tel.: + +33 426 23 38 34.

\* These authors contributed equally.

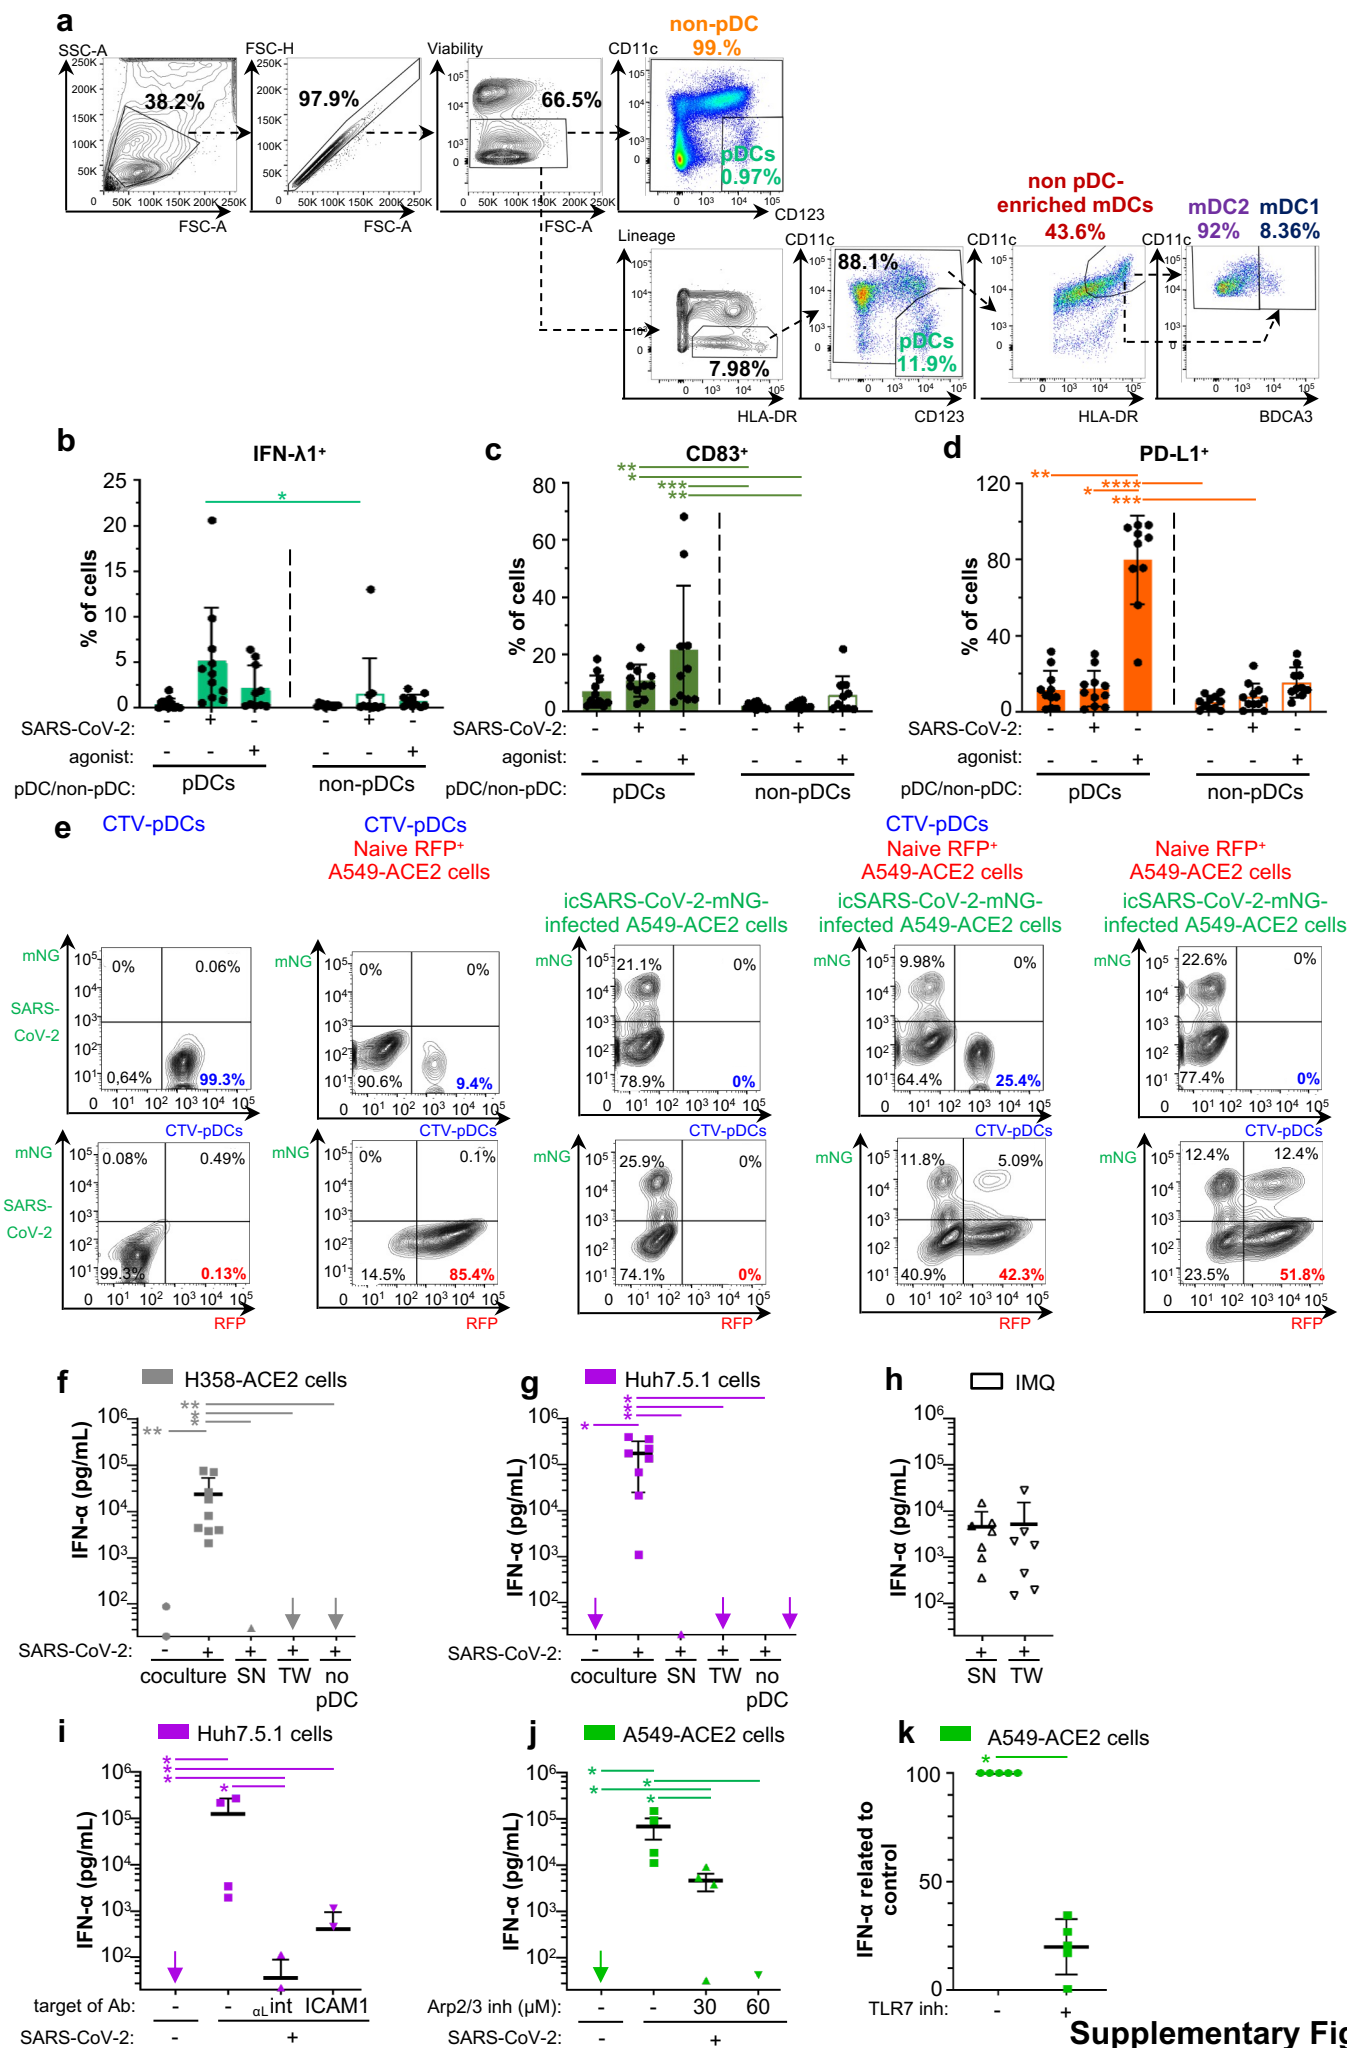

**Supplementary Fig. 1. Assessment of pDC response and their non-permissivity to infection.** **a**, Representative flow cytometric analysis of pDC gating strategy from PBMCs: pDCs gated as singulets<sup>+</sup> live cells<sup>+</sup> CD11c<sup>-</sup> CD123<sup>+</sup>; non-pDC PBMCs gated as singulets<sup>+</sup> live cells<sup>+</sup> CD11c<sup>+</sup> CD123<sup>-</sup>; non-pDC enriched mDCs gated as singulets<sup>+</sup> live cells<sup>+</sup> lineage [CD3, CD19, CD20, CD56, CD14, CD16]<sup>-</sup>, HLA-DR<sup>+</sup>, CD123<sup>-</sup> and CD11c<sup>+</sup> and CD11c<sup>+</sup>/BDCA3<sup>+</sup> *versus* CD11c<sup>+</sup>/BDCA3<sup>-</sup> for mDC1 and mDC2 subsets, respectively. **b-d**, PBMCs from healthy donors were cocultured with SARS-CoV-2-infected or uninfected A549-ACE2 cells or treated with agonists as in **Fig. 1c-d**, **b**, Frequency of positive cells for IFN- $\lambda$ 1 (**b**), CD83 (**c**) and PD-L1 (**d**) in populations gated as pDCs (left bars) non-pDC PBMCs (right bars). Means  $\pm$  SD; n=10-11 independent experiments using distinct healthy donors. **e**, A549-ACE2 cells were infected by icSARS-CoV-2-mNG for 24 hours prior to coculture with isolated CTV-stained pDCs and/or RFP<sup>+</sup>A549-ACE2 uninfected cells for 48 hours. Viral transmission from icSARS-CoV-2-mNG-infected cells to pDCs *versus* RFP<sup>+</sup>A549-ACE2-uninfected cells was assessed by flow cytometry. Results are expressed as the percentage of infected cells (mNG<sup>+</sup>) in the living cell populations gated as pDCs (CTV<sup>+</sup>) and non-pDCs (CTV<sup>-</sup>/RFP<sup>+</sup>). Means  $\pm$  SD; dot plots are representative of n=4-5 independent experiments. **f-k**, Quantification of IFN- $\alpha$  in SNs of pDCs cocultured with the indicated cell types infected or not by SARS-CoV-2. **f-g**, pDCs were cultured with infected cells, either in direct contact (coculture) or physically separated by the semi-permeable membrane of transwell [TW], or treated with supernatants [SN] from the corresponding SARS-CoV-2-infected cells. IFN- $\alpha$  concentration was also determined in the SN of SARS-CoV-2-infected cells cultured without pDC [no pDC]. **h**, In parallel experiments, treatment of pDCs with TLR7 agonist imiquimod [IMQ, 20  $\mu$ M] in coculture *versus* transwell settings served as positive control. Means  $\pm$  SD; n=3-9 independent experiments. **i-k**, Quantification of IFN- $\alpha$  in SN of pDCs cocultured with SARS-CoV-2-infected cells (A549-ACE2 and Huh7.5.1 cells as indicated) and treated or not with blocking antibodies against  $\alpha_L$ -integrin and ICAM-1 at 10  $\mu$ g/mL (**i**) or ARP2/3 inhibitor (CK-666) at the indicated concentrations (**j**), or with TLR7 inhibitor (IRS661; 0.35  $\mu$ M, **k**). Means  $\pm$  SD; Dots represent n=4-5 independent experiments. For all panels, when appropriated, p-values are indicated as follows:  $\leq 0.05$  as \*;  $\leq 0.005$  as \*\*;  $\leq 0.0005$  as \*\*\*; and  $\leq 0.00005$  as \*\*\*\*. Source data are provided as a Source Data file.

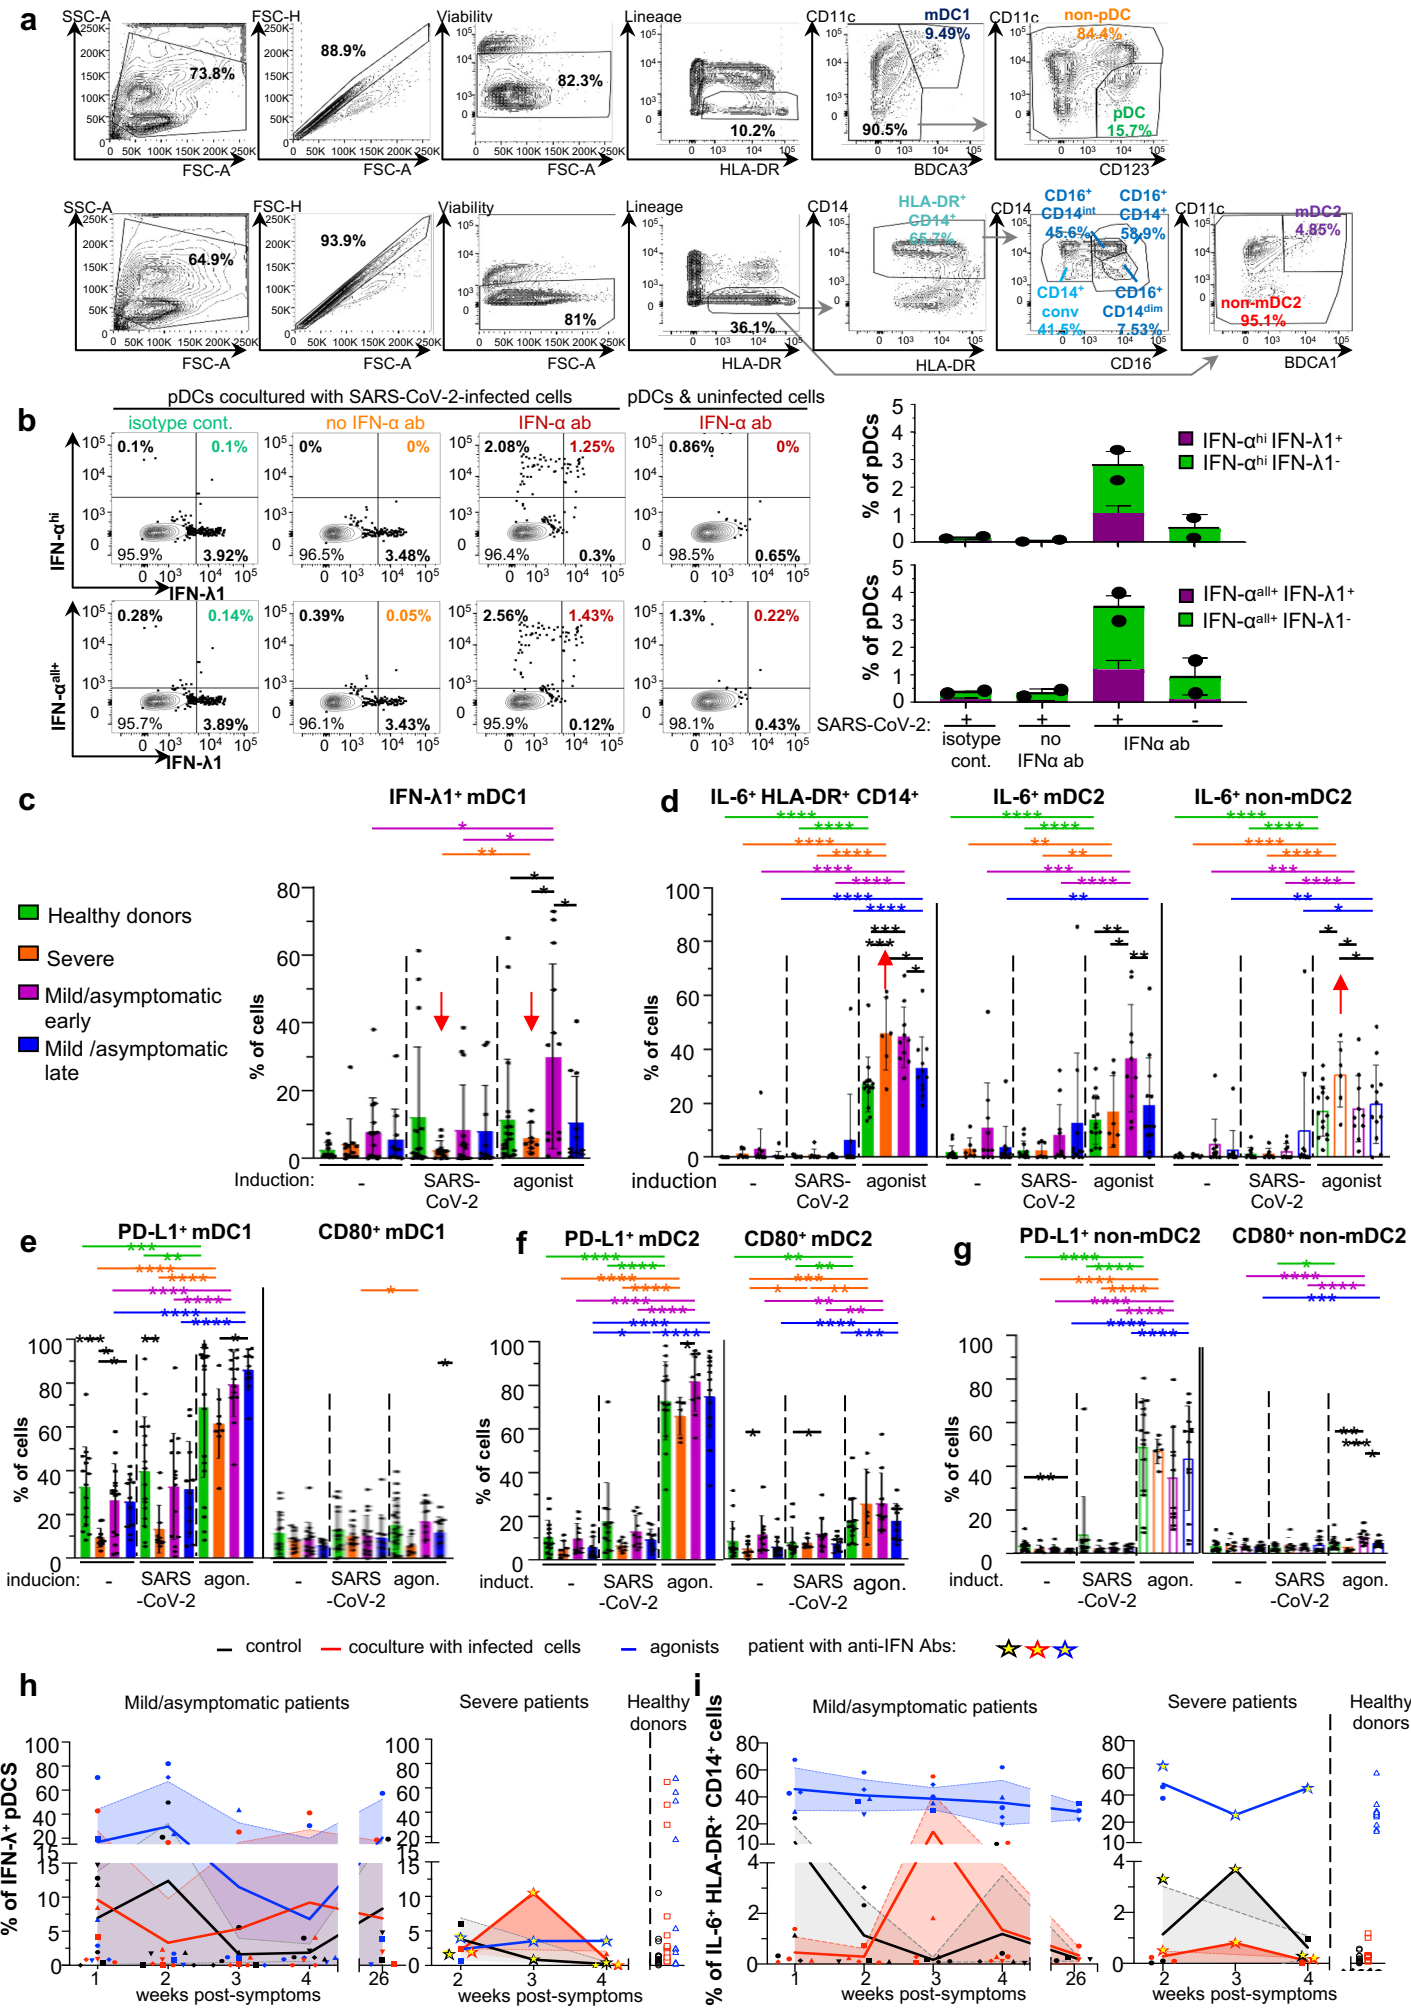

Supplementary Fig. 2

**Supplementary Fig. 2. Responsiveness of PBMCs from COVID-19 patients to SARS-CoV-2-infected cells versus agonist, related to Fig. 2.** PBMCs issued from the indicated groups of patients (*Healthy donors, Severe, Mild/asymptomatic early, Mild/asymptomatic late*, listed in **Table 1 and Supplementary Table 1**) were cocultured for 14-16 hours with SARS-CoV-2-infected or uninfected A549-ACE2 cells or treated with agonists as in **Fig. 2b-h**. **a**, Gating strategies for mDC1 and pDC/non-pDC (upper panels), and mDC2/non-mDC2/HLA-DR<sup>+</sup> CD14<sup>+</sup> monocytes (lower panels). **b**, Assessment of specific IFN- $\alpha$  detection by comparing the full antibody panel as in **Fig. 2b-h**. Cells were cocultured as in **Fig. 2b-h** and similarly analyzed using the same antibody panel [IFN- $\alpha$  ab] versus replacing only IFN- $\alpha$  antibody by IgG1 isotype control [isotype cont.] versus omitting only IFN- $\alpha$  antibody [no IFN- $\alpha$  ab]. The representative dot blots are presented in Left panels and the quantification in right panels; means; dots represent n=2 independent experiments. **c-g**, Quantification of the frequency of cells positive for IFN- $\lambda$ 1 in gated mDC1 (**c**), IL-6 in gated HLA-DR<sup>+</sup> CD14<sup>+</sup> monocytes, mDC2, non-mDC2 (**d**), CD80 and PD-L1 in gated mDC1 (**e**), mDC2 (**f**) and non-mDC2 (**g**). The numbers of included patient samples are listed in the **Table 1 and Supplementary Table 1**. **c-g**, Error bars represent the means  $\pm$  SD; each dot represents the level determined for PBMCs from one individual patients in each group, or healthy donors. The p-values are indicated as follows:  $\leq 0.05$  as \*;  $\leq 0.005$  as \*\*;  $\leq 0.0005$  as \*\*\*; and  $\leq 0.00005$  as \*\*\*\*. **h-i**, Kinetic analysis of pDC IFN- $\lambda$ 1<sup>+</sup> response (**h**) and HLA-DR<sup>+</sup> CD14<sup>+</sup> IL6<sup>+</sup> in PBMCs (**i**) collected from *Mild/asymptomatic* (left panel), *Severe* patients (middle panel) and *healthy donors* (right panel), upon *ex vivo* stimulation with SARS-CoV-2-infected cells (red) agonist (blue) versus control cells (black). As in **Fig. 2h**, dots for the *Severe* patient with circulating anti-IFN antibodies (see description in **Supplementary Table 1**) are represented by yellow-centered stars. Patient PBMCs were collected from symptom onset and results correspond the timeframes as follows: week 1= [Days 1-8]; 2= [Days 8-15]; 3= [Days 15-22]; 4= [Days 22-30]. Means (coloured lines) and errors (coloured areas) are indicated (n=20-24 analysed patients). Source data are provided as a Source Data file.

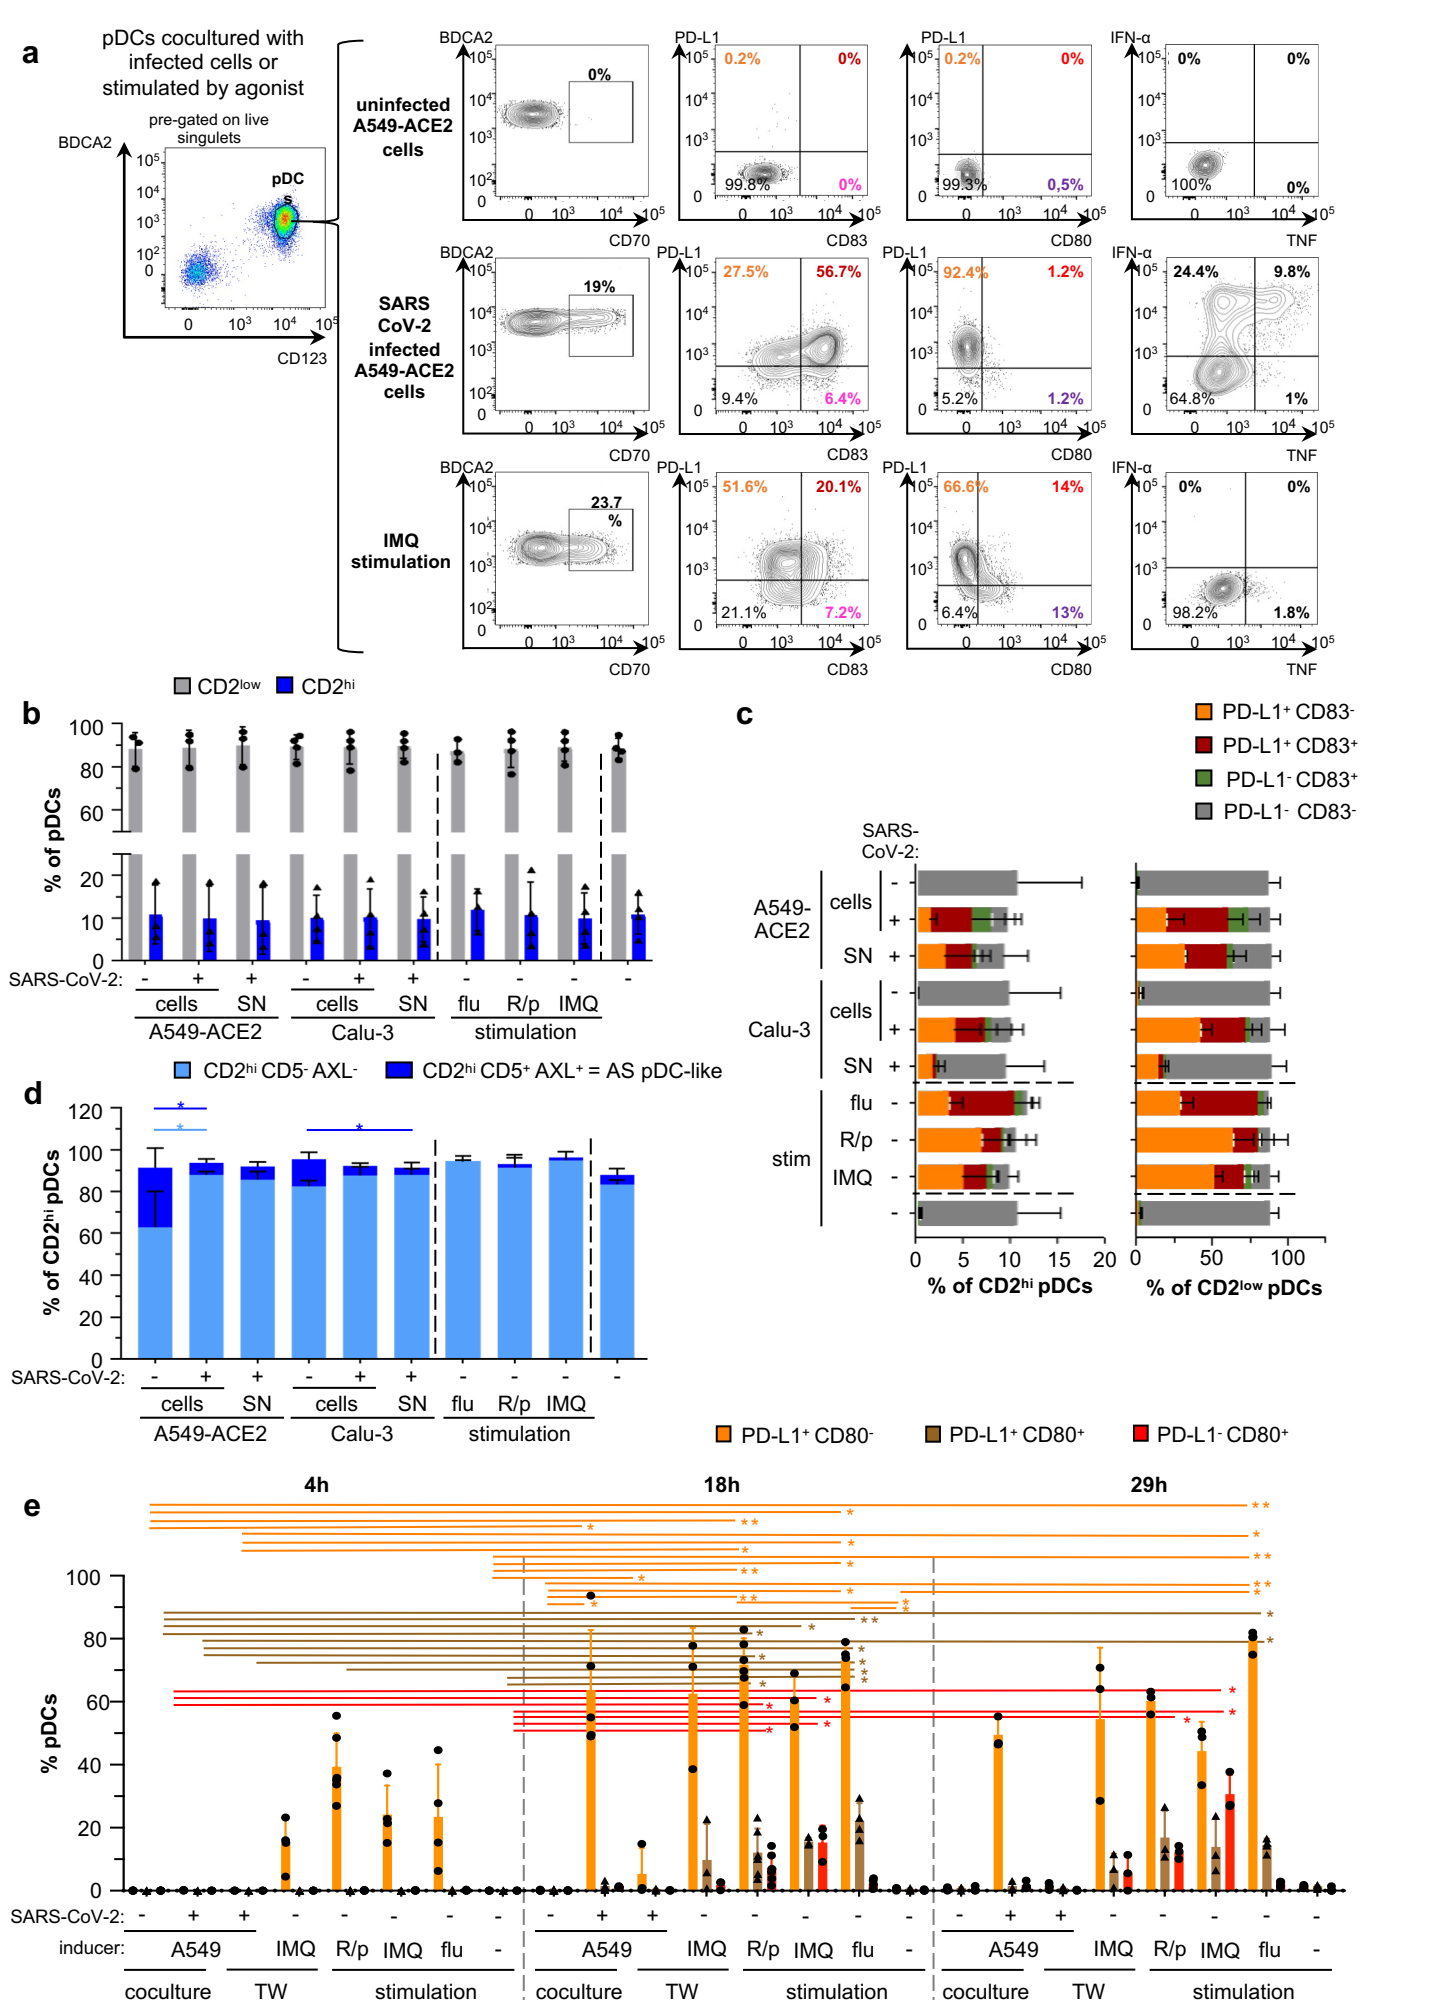

Supplementary Fig. 3

**Supplementary Fig. 3. Activation profile and diversification of pDCs in response to coculture with SARS-CoV-2-infected cells, as compared to synthetic agonist stimulation.**

Purified human pDCs were cocultured with uninfected [-] or SARS-CoV-2-infected [+] A549-ACE2 or Calu-3 cells, or cell-free SN collected from SARS-CoV-2-infected cells (48 hours of infection prior to coculture) or were stimulated with influenza virus [flu], R848/polyI:C [R/p] or imiquimod [IMQ], as in **Fig. 3a-b, d**. The samples were collected for FACS analysis at 14-16 hours of cocultures, and at the indicated times (**e**). **a**, Gating strategies used to determine the activation profile and diversification of pDCs. Dot plots showing the expression of BDCA2/CD70, PD-L1/CD83, PD-L1/CD80, IFN- $\alpha$ /TNF are representative of n=3-5 independent experiments. **b-e**, Quantification by flow cytometry of the frequency of gated pDCs as: CD2<sup>hi</sup> and CD2<sup>low</sup> subsets (**b**), PD-L1/CD83 positivity in CD2<sup>hi</sup> and CD2<sup>low</sup> subsets (**c**), pDC subsets defined by CD2, CD5 and AXL (**d**), and of subset assigned by PD-L1/CD80 and determined at the coculture duration indicated at the top of the graph (**e**). Bars represent means  $\pm$  SD; n=3-5; The data were analyzed using Kruskal-Wallis Global test and p-values were calculated with Tukey and Kramer test; ns: p >0,05; \*p<0,05; \*\*p<0,005. Source data are provided as a Source Data file.

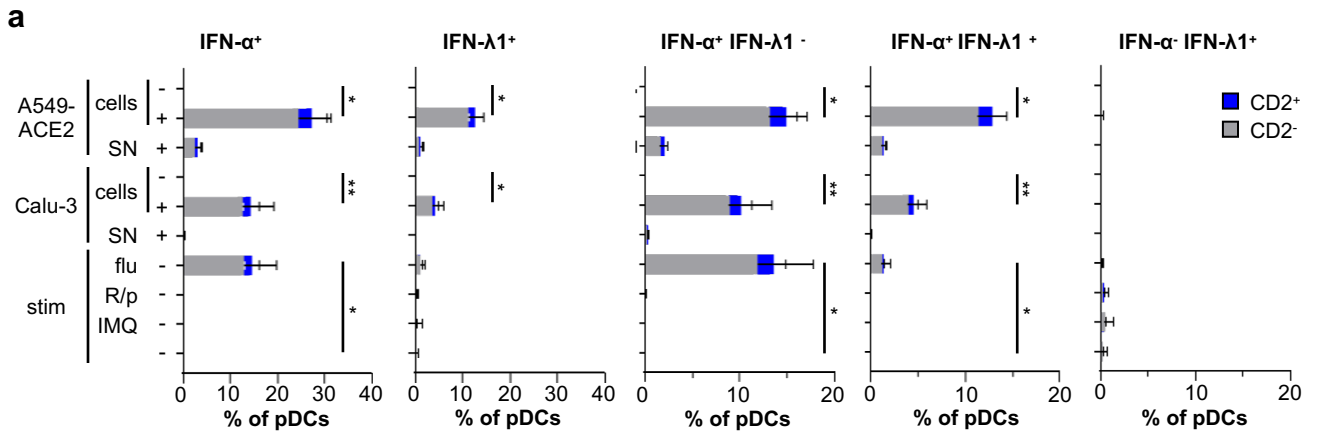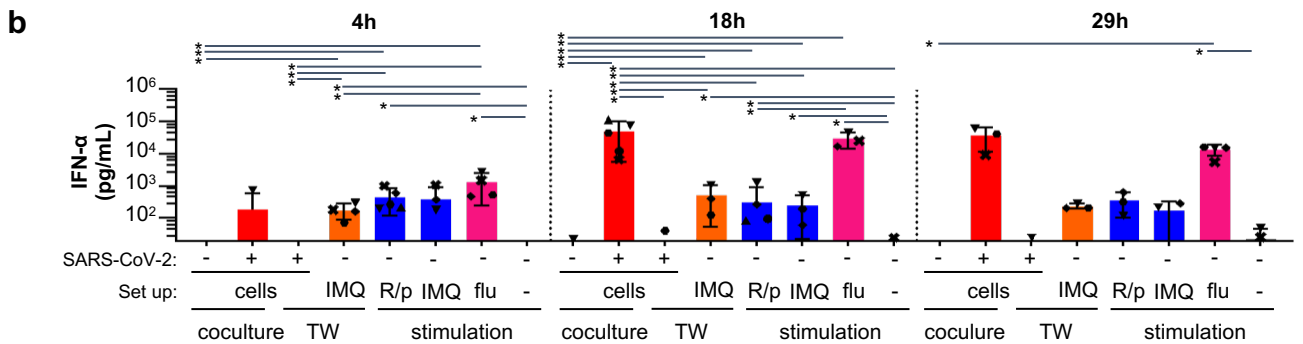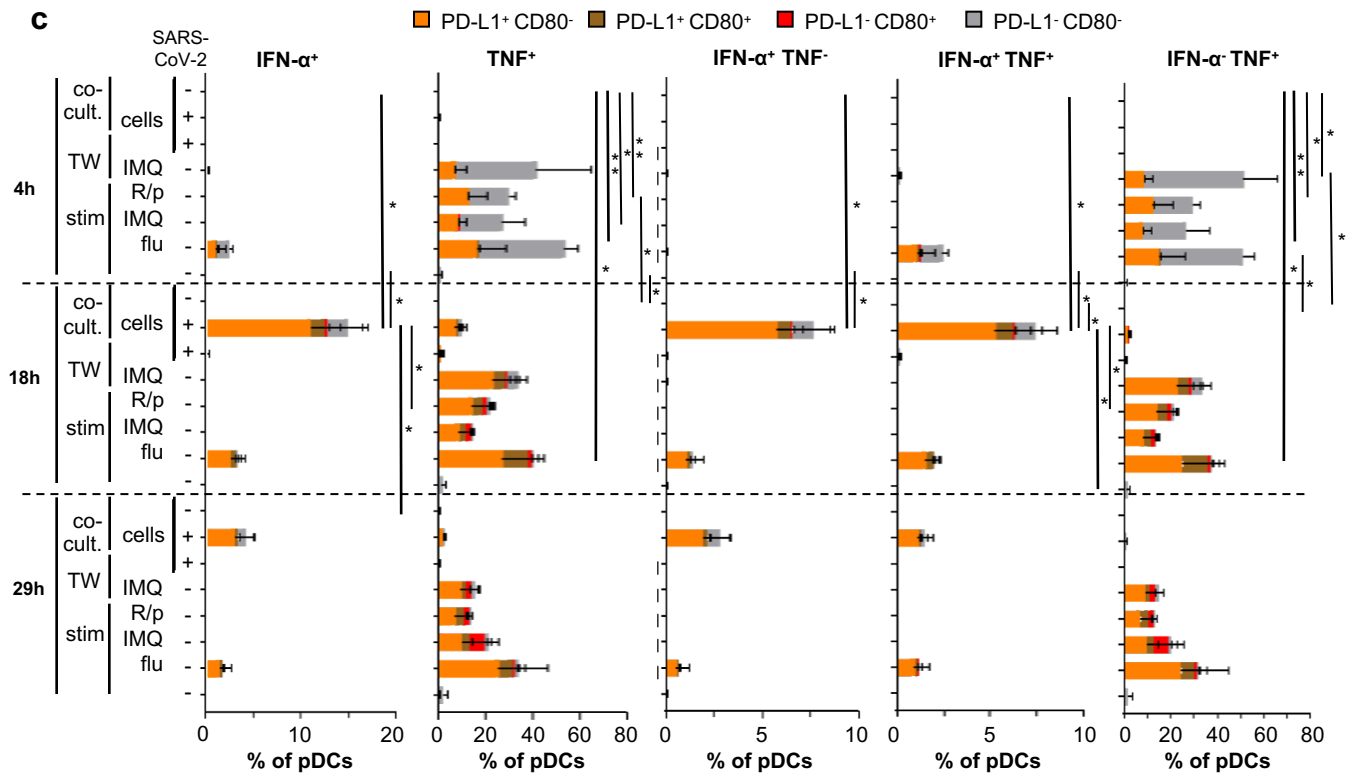



**Supplementary Fig. 4. Cell-cell contact sensing of SARS-CoV-2-infected cells by pDCs induces a robust production of IFN-I/ $\lambda$  and other cytokines.** Human pDCs isolated from healthy donors were cocultured with SARS-CoV-2-infected [+] or uninfected [-] cells, or were incubated with 100 $\mu$ l of cell-free SN collected immediately prior to coculture from the corresponding SARS-CoV-2-infected cells or were stimulated by cell-free influenza virus or synthetic agonists, as in **Fig. 4d-e**. **a**, Quantification by flow cytometry of the frequency of pDCs positive for IFN- $\alpha$  and/or IFN- $\lambda$ 1 in regard to positivity for CD2 subsets at 14-16 hours post-cocultures. **b-c**. Kinetic analysis of pDC cocultured with SARS-CoV-2- infected cells or not *versus* stimulations and determined at the coculture duration as indicated (top of the graph). **a**, quantification of IFN- $\alpha$  in SNs. **b**, Kinetic quantification by flow cytometry of the frequency of pDCs positives for IFN- $\alpha$  and/or TNF in regard to their diversification as PD-L1<sup>+</sup> and/or CD80<sup>+</sup> cells. Bars represent means  $\pm$  SD; n=3-5 independent experiments using distinct healthy donors. The data were analyzed using Kruskal-Wallis Global test and p-values were calculated with Tukey and Kramer test; ns: p >0,05; \*p<0,05; \*\*p<0,005. Source data are provided as a Source Data file.

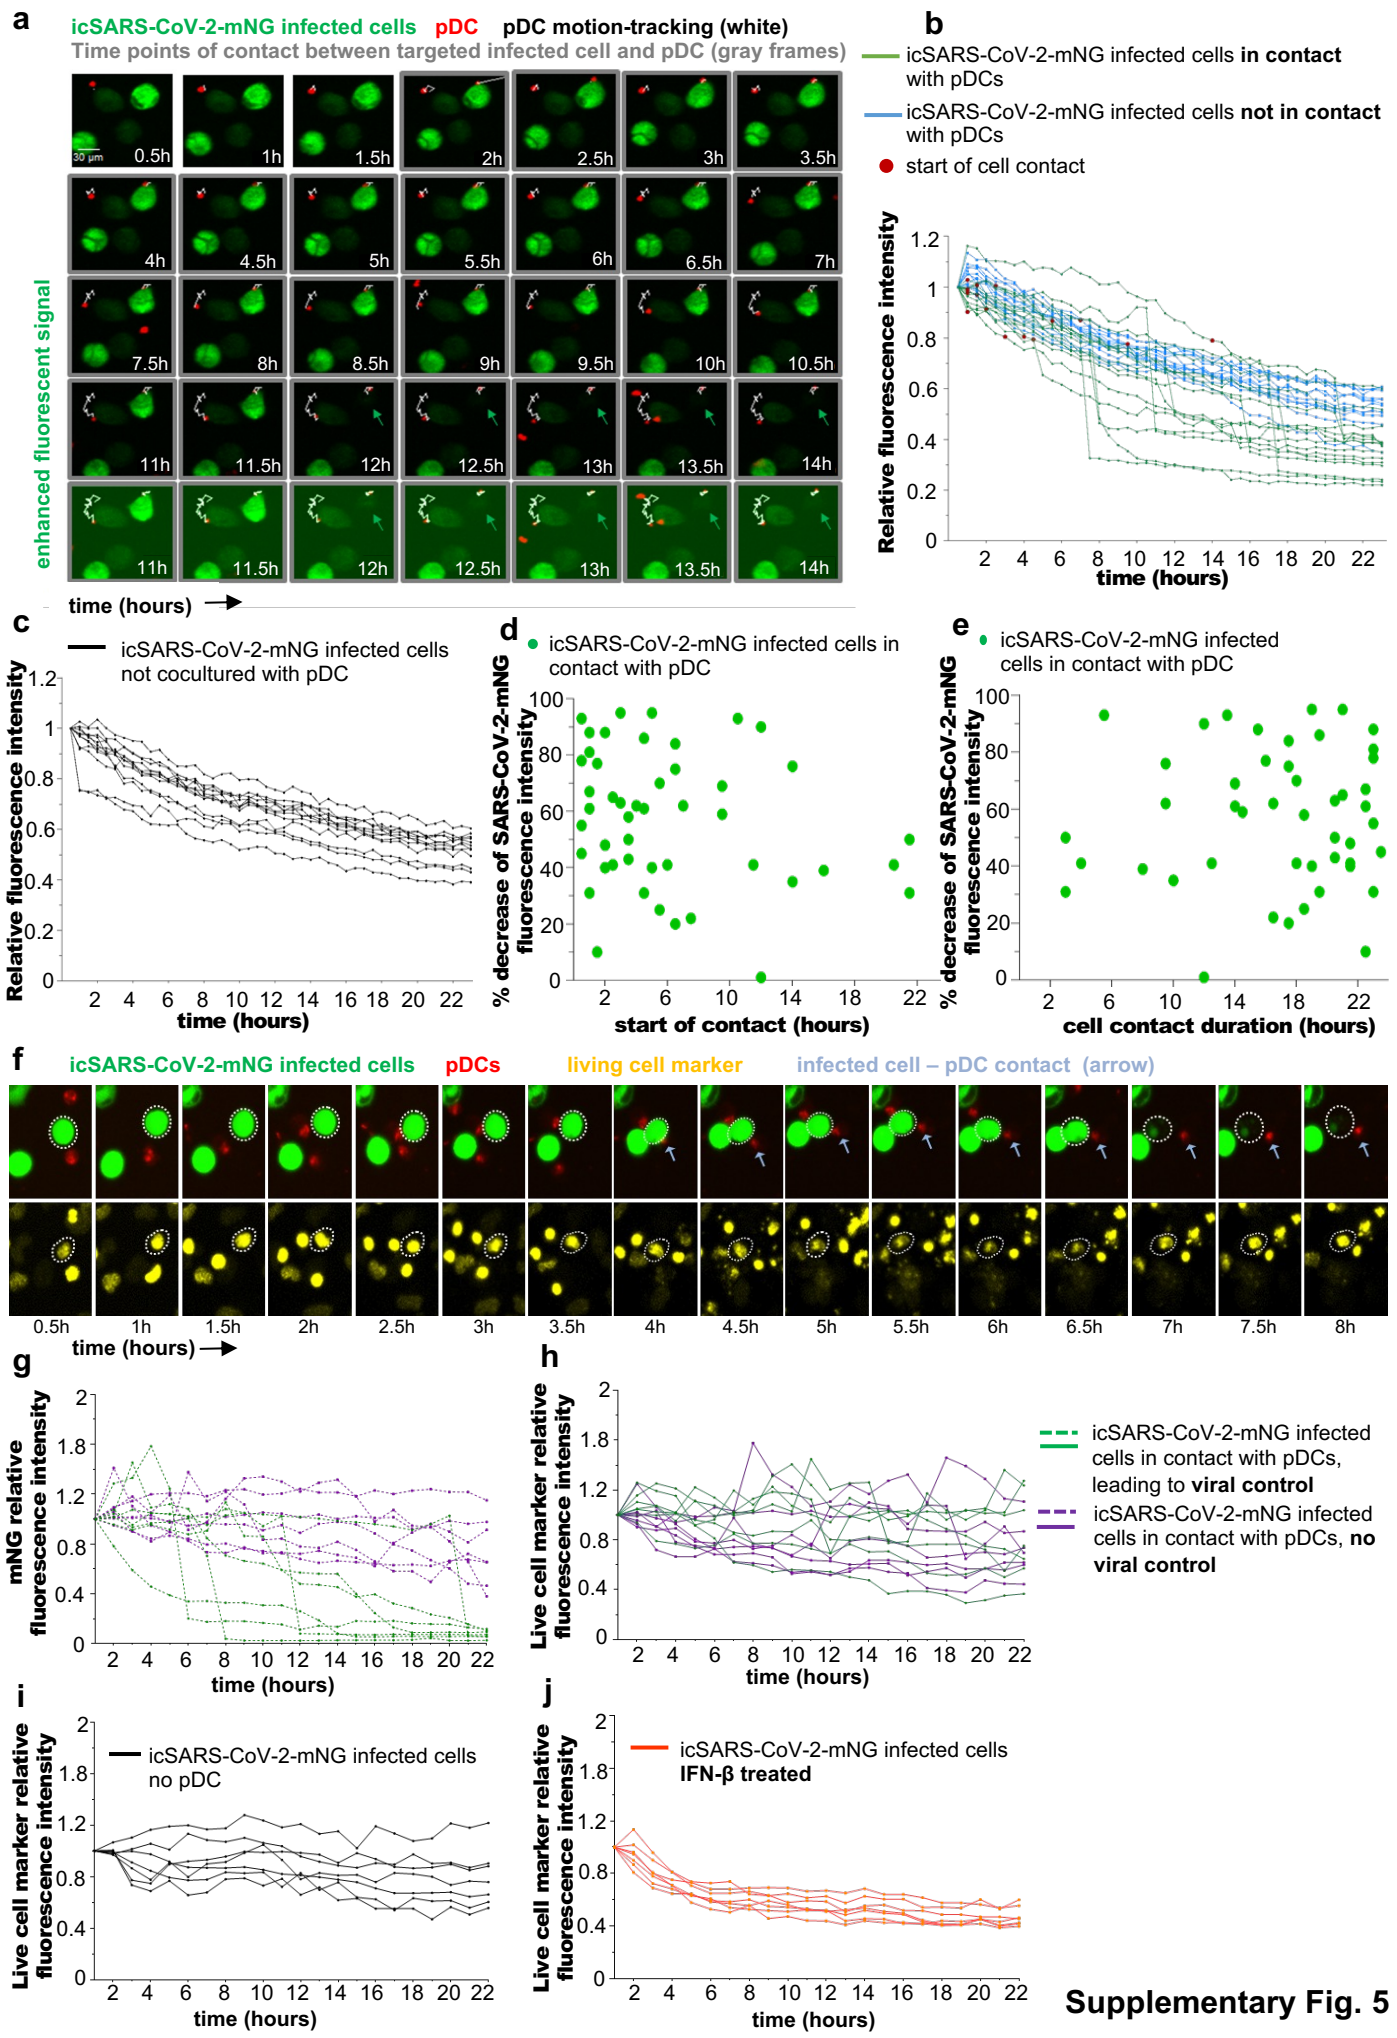

Supplementary Fig. 5

**Supplementary Fig. 5. Targeted antiviral activity of pDCs toward SARS-CoV-2-infected cells.** Live imaging of coculture of icSARS-CoV-2-mNG-infected cells with pDCs by spinning-disk confocal analysis, performed as in **Fig. 5. a**, Representative time-sequence of pDCs (red), tracked using motion automatic tracking plug-in in image J (white line) in contact with icSARS-CoV-2-mNG-infected cells (green arrow). The time points when pDCs are in contact with infected cells are framed in gray. Bottom panels show same imaging of the last 7 time points with enhanced fluorescence signal. **b-c**, Quantification of mNeogreen fluorescence intensity over time in individual icSARS-CoV-2-mNG-infected cells cocultured with pDCs when in contact (green curves) *versus* not in contact (blue curves) with pDCs (**b**), and as control/reference, in parallel cultures of icSARS-CoV-2-mNG-infected cells without pDC (**c**). The time point corresponding to the onset/start of contact is indicated by a red dot. Imaging analysis was performed and represented as in **Fig. 5b-c**; n=12 individual recorded cell analyzed per condition from one representative experiment. **d-e**, Scatter graphs representing the decrease of icSARS-CoV-2-mNG fluorescence intensity in individual icSARS-CoV-2-mNG infected cell identified as in contact with pDC and in relationship with the time of contact onset (**d**) and cell contact duration (**e**) expressed in hours. Results are expressed as the percentage of decrease of icSARS-CoV-2-mNG fluorescence at the end relative to the beginning of the contact (set to 100); 4 independent experiments with each dots representing an individual infected cell; n=48 (**d**) and n=48 (**e**). **f-j**, The icSARS-CoV-2-mNG-infected cells were stained with a fluorescent live cell marker prior to coculture with pDCs and real-time imaging by spinning-disk confocal analysis. **f**, Representative time-sequence of pDCs (DiD stained, in red) cocultured with icSARS-CoV-2-mNG-infected cells (green) stained by living cell marker (yellow, lower panels). Dotted white circles indicate the infected cells with a robust decrease of mNG fluorescence intensity, but not of the living cell marker (yellow, lower panels) and arrow indicated the pDC in contact to this infected cell. **g-j**, Calculation of the fluorescence intensity of mNeogreen (**g**) and the fluorescent live cell marker (**h-j**) over time in individual icSARS-CoV-2-mNG-infected cells cocultured and in contact with pDCs, leading to control of viral replication defined as a decreased fluorescence intensity > 50% relative to the initial mNG fluorescent intensity (green curves) or not (purple curves). **i-j**, Simultaneous record of cultures of icSARS-CoV-2-mNG-infected cells in the absence of pDC (black, **i**) or treated with recombinant IFN- $\beta$  (100 UI/mL, red, **j**) served as control/reference. The results are presented as the fluorescence intensity at the indicated time relative to time 0 of record corresponding to the contact onset and set to 1 (**g-h**); n= 7 individually recorded cells analyzed per condition from 2 independent experiments, and representative of a total n= 15 individually recorded cells analyzed per condition. Source data are provided as a Source Data file.

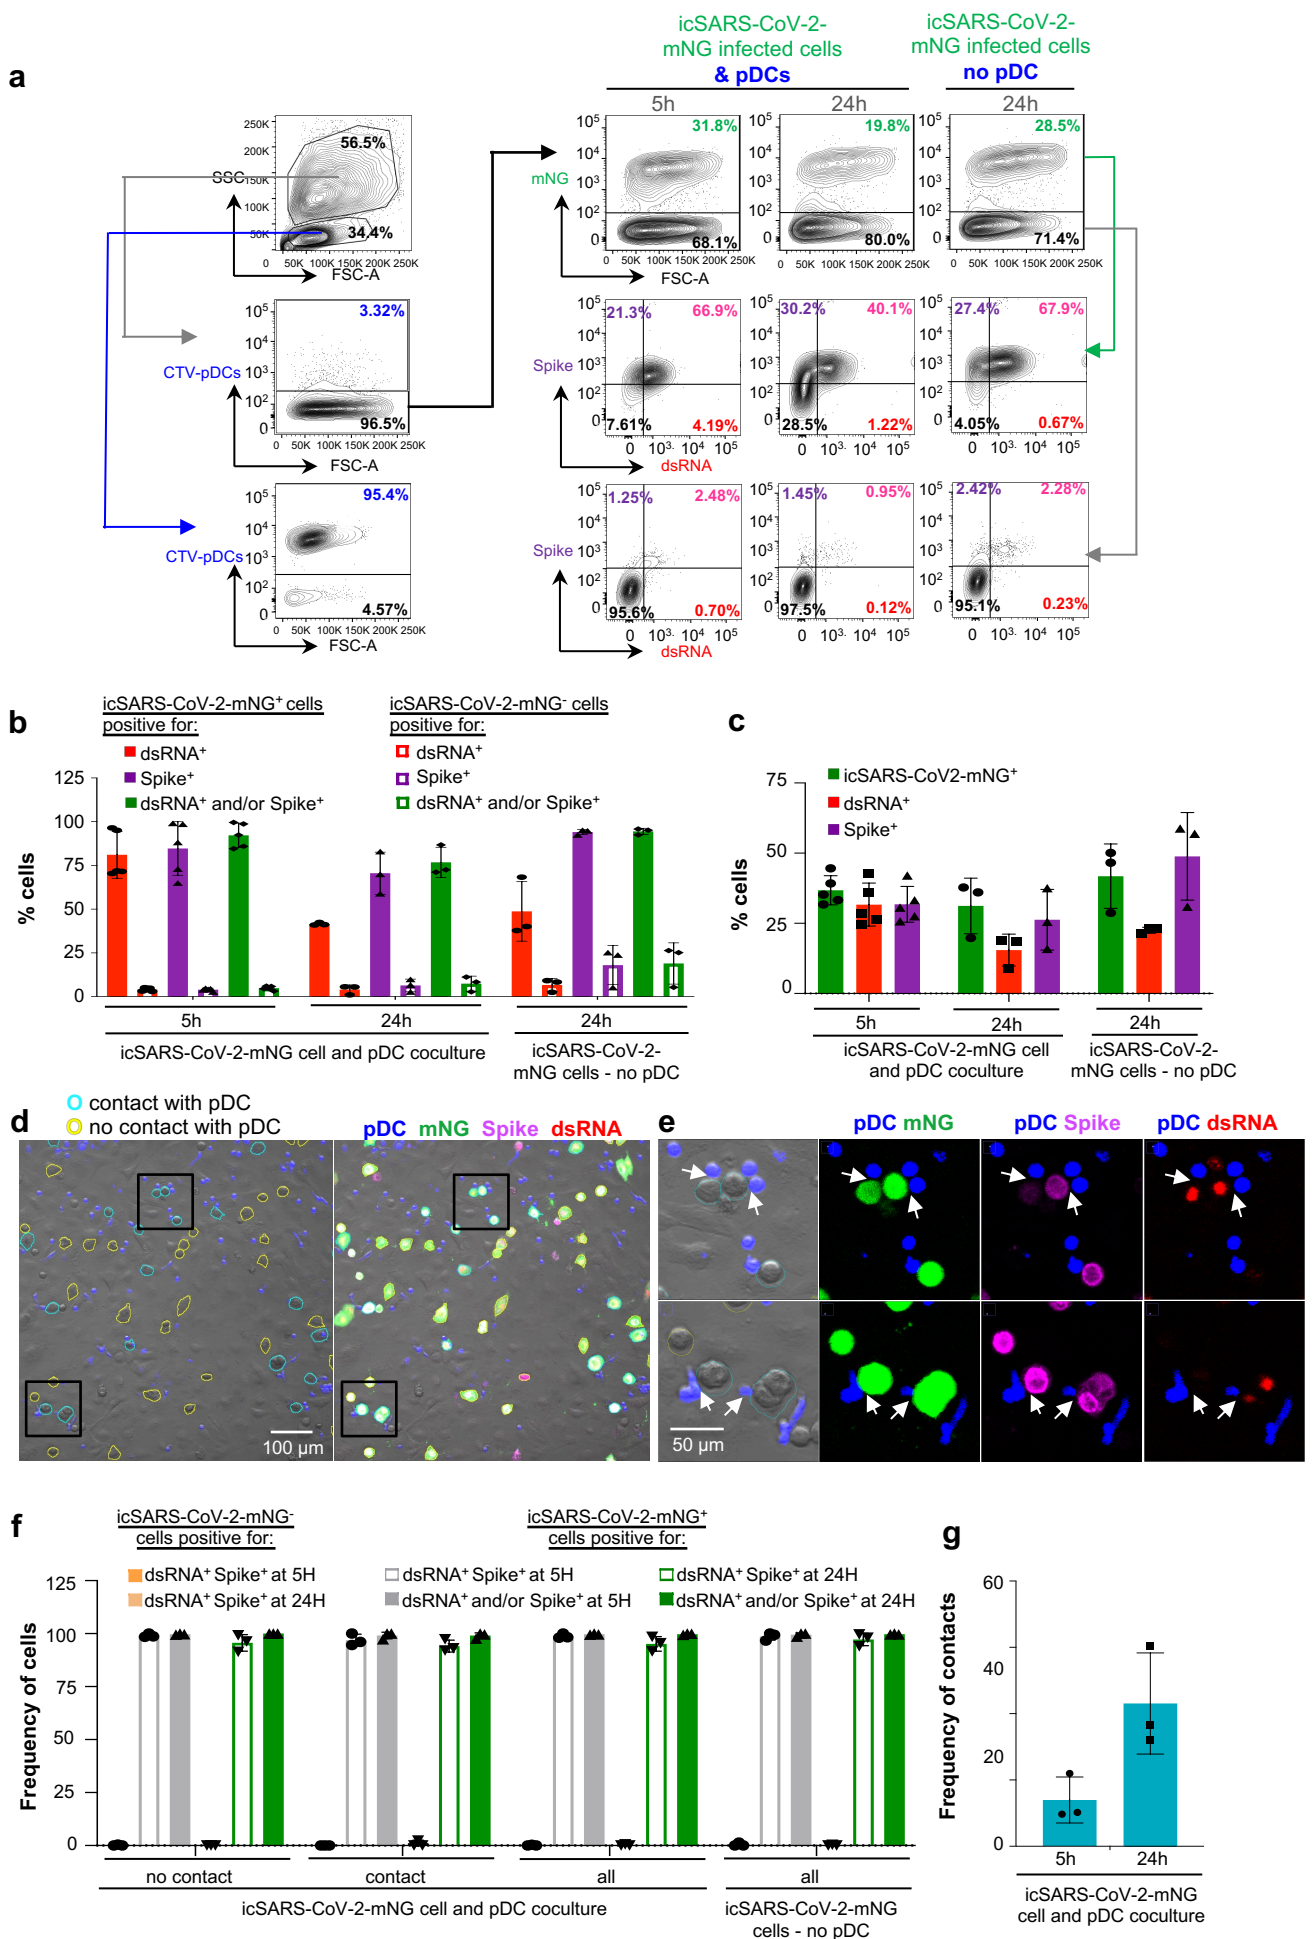

Supplementary Fig. 6

**Supplementary Fig. 6. Validation of the icSARS-CoV-2-mNG to track in live imaging the viral spread and replication, related to Fig. 4f-g and Fig. 5,** A549-ACE2 cells were infected by icSARS-CoV-2-mNG for 24 hours and then cocultured with isolated pDCs or not [no pDC], as in **Fig. 4f-g**, for 5 and 24 hours. The dsRNA viral replicative intermediate and the Spike protein — representative of viral replication/infection — were assessed by Flow cytometry in the cell population gated as pDC-CTV<sup>-</sup> (**a**, left panels representative dot blots of pDCs and infected cells cocultured for 5 hours), and further sorted according to mNG expression (**a**, 3 upper panel on the right side): to as mNG<sup>+</sup> (middle panels) *versus* mNG<sup>-</sup> cells (lower panel). **b**, The cell frequency of dsRNA<sup>+</sup>, Spike<sup>+</sup> *versus* dsRNA<sup>+</sup> and/or Spike<sup>+</sup> were quantified among icSARS-CoV-2-mNG<sup>+</sup> cells (plain bars) and icSARS-CoV-2-mNG<sup>-</sup> cells (empty bars) at 5 and 24 hours post-coculture with pDCs or without [no pDC]; means  $\pm$  SD; n=3 independent experiments. The corresponding representative dot blots are presented in **a**, middle and lower panel on the right side). **c**, As complementary controls, the cell frequency of icSARS-CoV-2-mNG<sup>+</sup>, dsRNA<sup>+</sup>, Spike<sup>+</sup> were quantified among cell population sorted as non-CTV-pDC<sup>-</sup> (without the distinction of mNG<sup>+</sup> and mNG<sup>-</sup>). Error bars represent the means  $\pm$  SD; each dot represents one independent experiments. **d-g**, Cocultures of icSARS-CoV-2-mNG-infected cells and pDCs were performed as in **Fig. 5**. **a-e**, Representative confocal imaging of pDCs (CTV-stained, blue) and icSARS-CoV-2-mNG-infected cells (mNG, green) immunostained by antibodies against dsRNA (red) and Spike (purple) at 24 hours post-cocultures. **d**, representative pictures of CTV-detection projected on the phase contrast imaging and presenting the automatic tracking of infected cells in contact with pDCs (*i.e.*, defined within a cell-to-cell distance < 5  $\mu$ m; blue circles) or not in direct contact (yellow circles) and corresponding detections of CTV-pDCs, mNG, dsRNA and Spike protein projected on phase contrast imaging, left and right panels respectively. **e**, Magnifications of the two black-boxed areas, displayed from left to right panels for detection of: CTV/phase contrast with the tracking of contact/no contact with a pDC (blue/yellow circles); mNG/CTV; Spike/CTV and dsRNA/CTV. **f**, Quantification of the frequency of cells positive for both dsRNA<sup>+</sup> and Spike<sup>+</sup> (plain bars) or dsRNA<sup>+</sup> and/or Spike<sup>+</sup> (empty bars) among either the icSARS-CoV-2-mNG<sup>-</sup> cells (orange) or icSARS-CoV-2-mNG<sup>+</sup> cells at 5 hours (grey bars) and 24 hours (green bars) of coculture when defined in cells not in contact with pDC [no contact], nearby pDCs *i.e.*, cell-to-cell distance < 5  $\mu$ m [contact] and in all cells cocultured with pDCs [all] or not [all/no pDC], as indicated on the X-axis. **g**, Quantification of the frequency icSARS-CoV-2-mNG<sup>+</sup> cells in contact with pDCs at 5 and 24 hours of coculture. Results represent means  $\pm$  SD; n=3 independent experiments, including n=1495; n=1153; n=859 and n= 444 analyzed cells for infected cell/pDC cocultures at 24 hours; idem at 5 hours; infected cell/no pDC at 24 hours and idem at 5 hours, respectively. Source data are provided as a Source Data file.

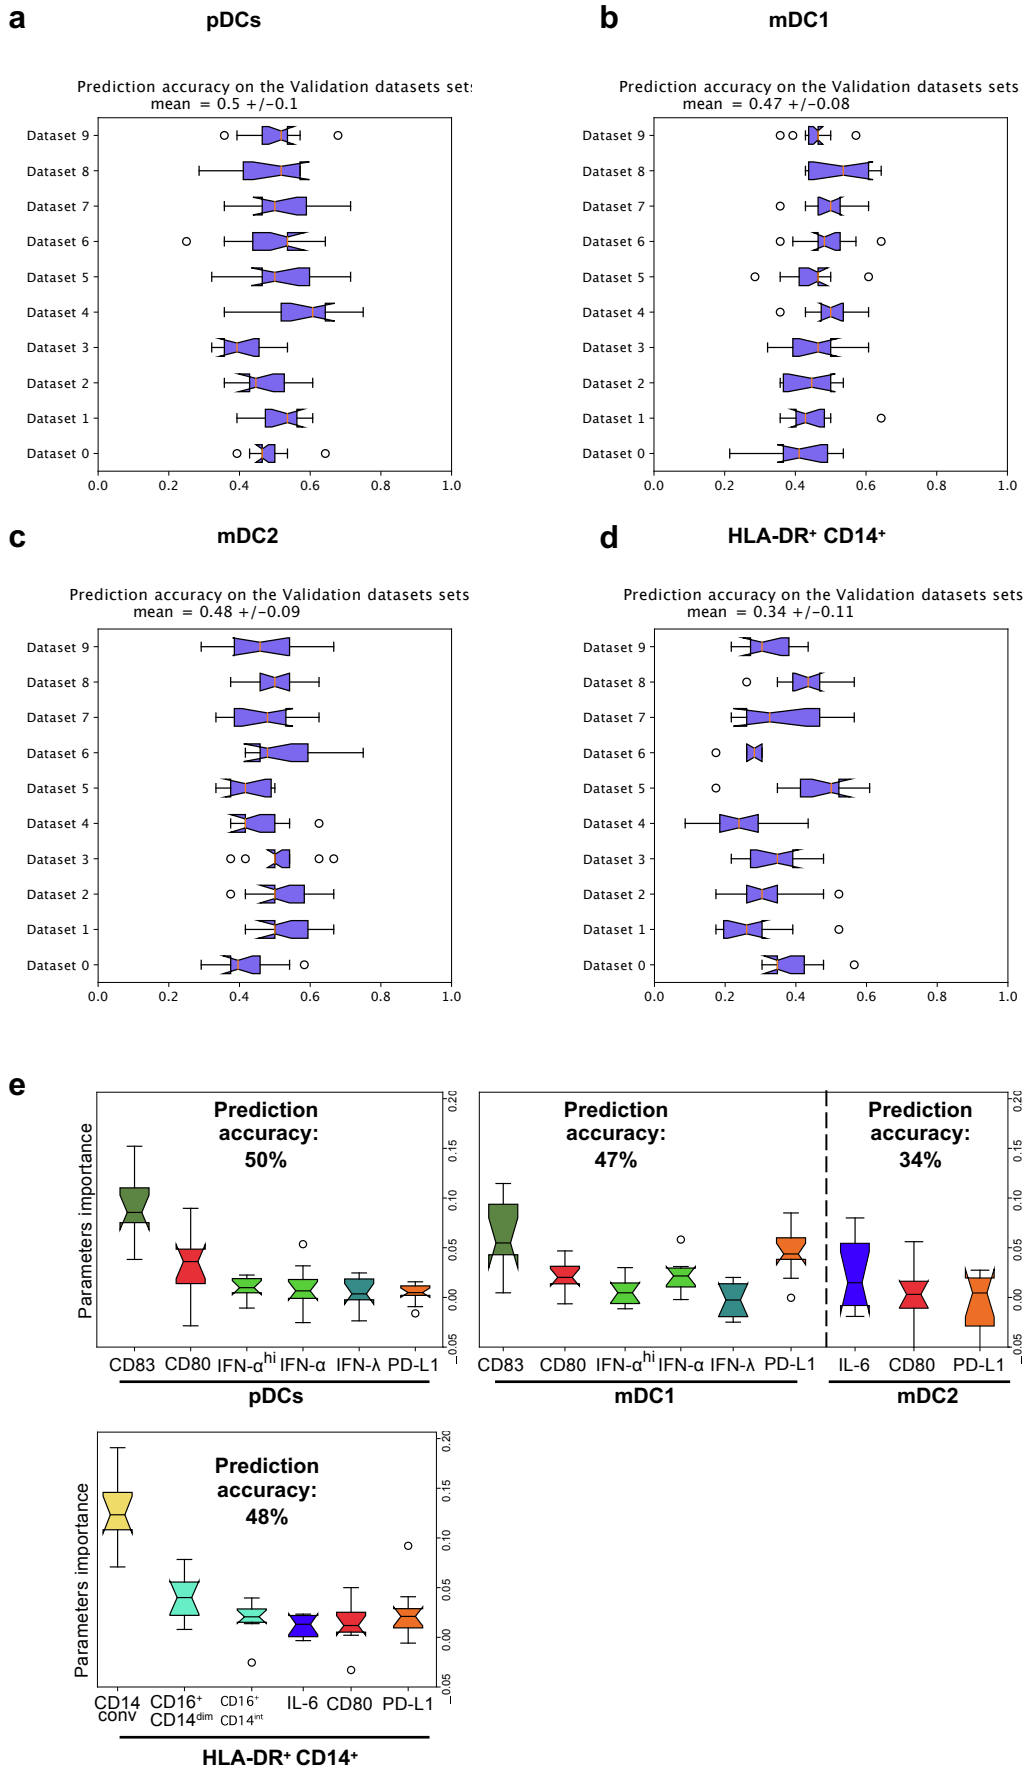

**Supplementary Fig. 7. Analysis of the flow cytometry dataset using a Machine learning approach based on Gradient Boosting.** PBMCs issued from the different groups of patients (*i.e.*, healthy donors; severe; mild/asymptomatic early; mild/asymptomatic late) were cocultured for 14-16 hours with SARS-CoV-2-infected or uninfected A549-ACE2 cells, or treated with agonists [31.8  $\mu$ M R848 and 42.22  $\mu$ M polyI:C or 2.04  $\mu$ M LPS], followed by the multiparametric analysis using flow cytometry. Analysis of the flow cytometry dataset was performed using a Machine learning approach based on Gradient Boosting. Graphs represent the mean accuracy prediction for the validation sets with the cell type specific models: pDCs (**a**), mDC1 (**b**), mDC2 (**c**) and HLA-DR<sup>+</sup> CD14<sup>+</sup> monocytes (**d**). For each cell type, 10 datasets were randomly generated. Each Validation set was used to challenge 10 models built with different down-sampling coupled to a cross-validation approach with 10 splits. The accuracy obtained with each cell type is indicated in the upper-title with the standard deviation taking into account all predictions. **e**, Upper-titles indicate the predictive accuracy in the validation set of samples for each cell populations as gated as pDCs, mDC1 and mDC2 subsets and HLA-DR<sup>+</sup>CD14<sup>+</sup> monocytes (see gating strategies in **Supplementary Fig. 2a**). Graphs display the parameters importance in predicting the severity/group of patients from the validation set, *via* comparative analyses of all cell surface expressed-differentiation markers and intracellular cytokines defined in different cell types, with inclusion of the distinction of IFN- $\alpha^{\text{all}}$  and IFN- $\alpha^{\text{hi}}$ . Error bars correspond to the standard deviation of the mean importance of each parameter for each of the 10 down-sampling iterations over all iterations. For all graphs, bounds of the box plots correspond to the Interquartile Range (IQR) and the median displayed as a line in the box. Notches represent the confidence interval (CI) around the median. In case values of the CI are less than the lower quartile or greater than the upper quartile, the notches will extend beyond the box, giving it a distinctive « flipped » appearance. The lower whisker corresponds to [ Q1-1.5\*IQR (where Q1 corresponds to the first quartile)], while the upper whisker corresponds to [ Q3+1.5\*IQR (where Q3 corresponds to the third quartile)]. Beyond the whiskers, data are considered outliers and are plotted as individual points. Source data are provided as a Source Data file.

| Fig. 1a               |             |                     |                    |             |                       |                      |
|-----------------------|-------------|---------------------|--------------------|-------------|-----------------------|----------------------|
|                       | tPBMCs & SN | tPBMCs & cont cells | tPBMCs & inf cells | PBMC/no pDC | iso pDCs & cont cells | iso pDCs & inf cells |
| tPBMCs & cont cells   | NS          |                     |                    |             |                       |                      |
| tPBMCs & inf cells    | 1.3E-2      | 2.0E-2              |                    |             |                       |                      |
| PBMC/no pDC           | NS          | NS                  | 2.0E-2             |             |                       |                      |
| iso pDCs & cont cells | NS          | NS                  | 1.0E-2             | NS          |                       |                      |
| iso pDCs & inf cells  | 1.0E-2      | 1.3E-2              | 1.0E-2             | 1.3E-2      | 1.0E-2                |                      |
| no PBMC/pDC           | NS          | NS                  | 2.7E-2             | NS          | NS                    | 2.0E-2               |

| Fig. 1b               |             |                     |                    |             |                       |                      |
|-----------------------|-------------|---------------------|--------------------|-------------|-----------------------|----------------------|
|                       | tPBMCs & SN | tPBMCs & cont cells | tPBMCs & inf cells | PBMC/no pDC | iso pDCs & cont cells | iso pDCs & inf cells |
|                       | p-value     |                     |                    |             |                       |                      |
| tPBMCs & cont cells   | NS          |                     |                    |             |                       |                      |
| tPBMCs & inf cells    | 7.8E-3      | 3.0E-3              |                    |             |                       |                      |
| PBMC/no pDC           | NS          | NS                  | 7.8E-3             |             |                       |                      |
| iso pDCs & cont cells | NS          | NS                  | 2.2E-3             | NS          |                       |                      |
| iso pDCs & inf cells  | 5.2E-3      | 2.2E-3              | 9.6E-4             | 6.1E-3      | 1.8E-3                |                      |
| no PBMC/pDC           | NS          | NS                  | 4.7E-3             | NS          | 2.8E-3                | NS                   |

| Fig. 3a           |          |                   |          |             |          |
|-------------------|----------|-------------------|----------|-------------|----------|
| Conditions        | p-values | Conditions        | p-values | Conditions  | p-values |
| cont/inf A549     | 0.1422   | cont vs inf Calu  | 0.2336   | flu vs R/p  | 0.7757   |
| cont vs SN A549   | 0.6757   | cont vs SN Calu   | 0.7814   | flu vs IMQ  | 0.9817   |
| cont A549 vs unst | 0.5854   | cont Calu vs unst | 0.6416   | flu vs -    | 0.08075  |
| inf vs SN A549    | 0.8285   | inf vs SN Calu    | 0.7814   | flu vs unst | 0.005452 |
| inf A549 vs unst  | 0.003771 | inf Calu vs unst  | 0.007665 | R/p vs IMQ  | 0.9832   |
| SN A549 vs unst   | 0.09953  | SN Calu vs unst   | 0.1273   | R/p vs -    | 0.495    |
|                   |          |                   |          | R/p vs unst | 0.06238  |
|                   |          |                   |          | IMQ vs -    | 0.3019   |
|                   |          |                   |          | IMQ vs unst | 0.03644  |
|                   |          |                   |          | - vs unst   | 0.7886   |

| Fig. 3b          |          |                  |          |            |          |
|------------------|----------|------------------|----------|------------|----------|
| Conditions       | p-values | Conditions       | p-values | Conditions | p-values |
| cont vs inf A549 | 0.007987 | cont vs inf Calu | NS       | flu vs R/p | 0.908    |
| cont vs SN A549  | 0.3505   | cont vs SN Calu  | NS       | flu vs IMQ | 0.9025   |
| inf vs SN A549   | 0.3505   | inf vs SN Calu   | NS       | flu vs -   | 0.07767  |
|                  |          |                  |          | R/p vs IMQ | 0.4755   |
|                  |          |                  |          | R/p vs -   | 0.1907   |
|                  |          |                  |          | IMQ vs -   | 0.008473 |

| Fig. 3c          |          |                  |          |            |          |
|------------------|----------|------------------|----------|------------|----------|
| PD-L1+ CD83-     |          |                  |          |            |          |
| Conditions       | p-values | Conditions       | p-values | Conditions | p-values |
| cont vs inf A549 | 0.1815   | cont vs inf Calu | 0.004845 | flu vs R/p | 0.2267   |
| cont vs SN A549  | 0.009154 | cont vs SN Calu  | 0.2592   | flu vs IMQ | 0.5517   |
| inf vs SN A549   | 0.4671   | inf vs SN Calu   | 0.2592   | flu vs -   | 0.735    |
|                  |          |                  |          | R/p vs IMQ | 0.9216   |
|                  |          |                  |          | R/p vs -   | 0.008514 |
|                  |          |                  |          | IMQ vs -   | 0.05544  |

| PD-L1+ CD83+     |          |                  |          |            |          |
|------------------|----------|------------------|----------|------------|----------|
| Conditions       | p-values | Conditions       | p-values | Conditions | p-values |
| cont vs inf A549 | 0.009154 | cont vs inf Calu | 0.004845 | flu vs R/p | 0.2267   |
| cont vs SN A549  | 0.1815   | cont vs SN Calu  | 0.2592   | flu vs IMQ | 0.5517   |
| inf vs SN A549   | 0.4671   | inf vs SN Calu   | 0.2592   | flu vs -   | 0.004232 |
|                  |          |                  |          | R/p vs IMQ | 0.9216   |
|                  |          |                  |          | R/p vs -   | 0.3894   |
|                  |          |                  |          | IMQ vs -   | 0.1195   |

| PD-L1+ CD83+     |          |                  |          |            |          |
|------------------|----------|------------------|----------|------------|----------|
| Conditions       | p-values | Conditions       | p-values | Conditions | p-values |
| cont vs inf A549 | 0.004845 | cont vs inf Calu | NS       | flu vs R/p | 0.1114   |
| cont vs SN A549  | 0.2592   | cont vs SN Calu  | NS       | flu vs IMQ | 0.9982   |
| inf vs SN A549   | 0.2592   | inf vs SN Calu   | NS       | flu vs -   | 0.2066   |
|                  |          |                  |          | R/p vs IMQ | 0.04494  |
|                  |          |                  |          | R/p vs -   | 0.9891   |
|                  |          |                  |          | IMQ vs -   | 0.09969  |

| Fig. 3d          |          |                  |          |            |          |
|------------------|----------|------------------|----------|------------|----------|
| PD-L1+ CD80-     |          |                  |          |            |          |
| Conditions       | p-values | Conditions       | p-values | Conditions | p-values |
| cont vs inf A549 | 0.02835  | cont vs inf Calu | 0.01995  | flu vs R/p | 0.7729   |
| cont vs SN A549  | 0.1364   | cont vs SN Calu  | 0.3721   | flu vs IMQ | 0.3158   |
| inf vs SN A549   | 0.8897   | inf vs SN Calu   | 0.3721   | flu vs -   | 0.006139 |
|                  |          |                  |          | R/p vs IMQ | 0.7729   |
|                  |          |                  |          | R/p vs -   | 0.03943  |
|                  |          |                  |          | IMQ vs -   | 0.5359   |

| PD-L1+ CD80+     |          |                  |          |            |          |
|------------------|----------|------------------|----------|------------|----------|
| Conditions       | p-values | Conditions       | p-values | Conditions | p-values |
| cont vs inf A549 | 0.08346  | cont vs inf Calu | NS       | flu vs R/p | 0.824    |
| cont vs SN A549  | 0.03957  | cont vs SN Calu  | NS       | flu vs IMQ | 0.932    |
| inf vs SN A549   | 0.8897   | inf vs SN Calu   | NS       | flu vs -   | 0.3102   |
|                  |          |                  |          | R/p vs IMQ | 0.9975   |
|                  |          |                  |          | R/p vs -   | 0.01486  |
|                  |          |                  |          | IMQ vs -   | 0.07767  |

| PD-L1- CD80+     |          |                  |          |            |          |
|------------------|----------|------------------|----------|------------|----------|
| Conditions       | p-values | Conditions       | p-values | Conditions | p-values |
| cont vs inf A549 | NS       | cont vs inf Calu | NS       | flu vs R/p | 0.7172   |
| cont vs SN A549  | NS       | cont vs SN Calu  | NS       | flu vs IMQ | 0.2729   |
| inf vs SN A549   | NS       | inf vs SN Calu   | NS       | flu vs -   | 0.6339   |
|                  |          |                  |          | R/p vs IMQ | 0.7729   |
|                  |          |                  |          | R/p vs -   | 0.04723  |
|                  |          |                  |          | IMQ vs -   | 0.007457 |

| Fig. 3e          |          |                  |          |            |          |
|------------------|----------|------------------|----------|------------|----------|
| Conditions       | p-values | Conditions       | p-values | Conditions | p-values |
| cont vs inf A549 | 0.03711  | cont vs inf Calu | 0.01428  | flu vs R/p | 0.929    |
| cont vs SN A549  | 0.03064  | cont vs SN Calu  | 0.09681  | flu vs IMQ | 0.9986   |
| inf vs SN A549   | 0.9969   | inf vs SN Calu   | 0.836    | flu vs -   | 0.04494  |
|                  |          |                  |          | R/p vs IMQ | 0.967    |
|                  |          |                  |          | R/p vs -   | 0.2707   |
|                  |          |                  |          | IMQ vs -   | 0.0679   |

| Fig. 3f                        |          |                                |          |
|--------------------------------|----------|--------------------------------|----------|
| Conditions with A549 cells     | p-values | Conditions with Calu cells     | p-values |
| no pDC cont vs no pDC inf A549 | 0.302    | no pDC cont vs no pDC inf Calu | NS       |
| no pDC cont vs pDC cont A549   | 0.7578   | no pDC cont vs pDC cont Calu   | NS       |
| no pDC cont vs pDC inf A549    | 0.9338   | no pDC cont vs pDC inf Calu    | NS       |
| no pDC inf vs pDC cont A549    | 0.8465   | no pDC inf vs pDC cont Calu    | NS       |
| no pDC inf vs pDC inf A549     | 0.04242  | no pDC inf vs pDC inf Calu     | NS       |
| pDC cont vs pDC inf A549       | 0.2883   | pDC cont vs pDC inf Calu       | NS       |



|              |                    | Fig. 4a             |                    |                   |                     |                    |                   |                     |                    |                   |                     |                    |                   |
|--------------|--------------------|---------------------|--------------------|-------------------|---------------------|--------------------|-------------------|---------------------|--------------------|-------------------|---------------------|--------------------|-------------------|
|              |                    | A549-ACE-2 cells    |                    |                   | Calu-3              |                    |                   | Hu7.5.1             |                    |                   | 293-ACE2            |                    |                   |
|              |                    | no.pDC & cont cells | no.pDC & inf cells | pDCs & cont cells | no.pDC & cont cells | no.pDC & inf cells | pDCs & cont cells | no.pDC & cont cells | no.pDC & inf cells | pDCs & cont cells | no.pDC & cont cells | no.pDC & inf cells | pDCs & cont cells |
| <i>MxA</i>   | no.pDC & inf cells | 0.9912              |                    |                   | 0.09751             |                    |                   | 1                   |                    |                   | 0.8536              |                    |                   |
|              | pDCs & cont cells  | 0.1199              | 0.05911            |                   | 0.9339              | 0.3194             |                   | 0.4559              | 0.4559             |                   | 0.3765              | 0.8536             |                   |
|              | pDCs & inf cells   | 0.0002978           | 8.249E-05          | 0.2551            | 0.01247             | 0.8798             | 0.06793           | 0.003389            | 0.003389           | 0.2035            | 2.88E-03            | 3.78E-02           | 0.2407            |
| <i>ISG15</i> | no.pDC & inf cells | 0.1986              |                    |                   | 0.1598              |                    |                   | 0.9831              |                    |                   | 0.9738              |                    |                   |
|              | pDCs & cont cells  | 0.9999              | 0.1786             |                   | 0.9339              | 0.4464             |                   | 0.6881              | 0.8831             |                   | 0.9821              | 0.9999             |                   |
|              | pDCs & inf cells   | 0.02854             | 1.248E-05          | 0.03322           | 0.005976            | 0.6343             | 0.03767           | 0.003389            | 0.0118             | 0.09194           | 0.07604             | 0.02386            | 0.02789           |
| <i>IFNL</i>  | no.pDC & inf cells | 0.2307              |                    |                   | 0.186               |                    |                   | 0.8465              |                    |                   | 0.4464              |                    |                   |
|              | pDCs & cont cells  | 0.8095              | 0.7479             |                   | 1                   | 0.186              |                   | 0.9825              | 0.6343             |                   | 0.6343              | 0.9909             |                   |
|              | pDCs & inf cells   | 0.00526             | 0.4924             | 0.07453           | 0.03057             | 0.8798             | 0.03057           | 0.05616             | 0.3194             | 0.01976           | 0.005976            | 0.2818             | 0.1598            |
| <i>IL6</i>   | no.pDC & inf cells | 0.7103              |                    |                   | 0.247               |                    |                   | 0.637               |                    |                   | 0.7084              |                    |                   |
|              | pDCs & cont cells  | 0.829               | 0.9966             |                   | 0.9988              | 0.3194             |                   | 0.7374              | 0.9985             |                   | 0.9186              | 0.3181             |                   |
|              | pDCs & inf cells   | 0.0002978           | 0.01506            | 0.00756           | 0.03057             | 0.8095             | 0.04614           | 0.001363            | 0.0614             | 0.03978           | 0.1765              | 0.01043            | 0.5058            |
| <i>TNF</i>   | no.pDC & inf cells | 0.02443             |                    |                   | 0.3543              |                    |                   | 0.4559              |                    |                   | 0.1862              |                    |                   |
|              | pDCs & cont cells  | 1                   | 0.02443            |                   | 1                   | 0.3543             |                   | 1                   | 0.4559             |                   | 1                   | 0.1862             |                   |
|              | pDCs & inf cells   | 0.0003726           | 0.6442             | 0.0003726         | 0.03136             | 0.6923             | 0.03136           | 0.003389            | 0.2035             | 0.003389          | 0.004638            | 0.5397             | 0.004638          |

| Fig. 4d IFN-α+ TNF- |          |                  |          |            |          |
|---------------------|----------|------------------|----------|------------|----------|
| Conditions          | p-values | Conditions       | p-values | Conditions | p-values |
| cont vs inf A549    | 0.007987 | cont vs inf Calu | 0.01995  | flu vs R/p | 0.4755   |
| cont vs SN A549     | 0.3505   | cont vs SN Calu  | 0.3721   | flu vs IMQ | 0.05547  |
| inf vs SN A549      | 0.3505   | inf vs SN Calu   | 0.3721   | flu vs -   | 0.02287  |
|                     |          |                  |          | R/p vs IMQ | 0.5055   |
|                     |          |                  |          | R/p vs -   | 0.3631   |
|                     |          |                  |          | IMQ vs -   | 1        |
| Fig. 4d IFN-α+ TNF+ |          |                  |          |            |          |
| Conditions          | p-values | Conditions       | p-values | Conditions | p-values |
| cont vs inf A549    | 0.007987 | cont vs inf Calu | 0.01995  | flu vs R/p | 0.3725   |
| cont vs SN A549     | 0.3505   | cont vs SN Calu  | 0.3721   | flu vs IMQ | 0.06909  |
| inf vs SN A549      | 0.3505   | inf vs SN Calu   | 0.3721   | flu vs -   | 0.03193  |
|                     |          |                  |          | R/p vs IMQ | 0.6761   |
|                     |          |                  |          | R/p vs -   | 0.566    |
|                     |          |                  |          | IMQ vs -   | 1        |
| Fig. 4d IFN-α- TNF+ |          |                  |          |            |          |
| Conditions          | p-values | Conditions       | p-values | Conditions | p-values |
| cont vs inf A549    | 0.01116  | cont vs inf Calu | NS       | flu vs R/p | 0.4755   |
| cont vs SN A549     | 0.2846   | cont vs SN Calu  | NS       | flu vs IMQ | 0.09454  |
| inf vs SN A549      | 0.4824   | inf vs SN Calu   | NS       | flu vs -   | 0.01476  |
|                     |          |                  |          | R/p vs IMQ | 0.6582   |
|                     |          |                  |          | R/p vs -   | 0.2765   |
|                     |          |                  |          | IMQ vs -   | 0.9779   |

| Fig. 4e IFN-α+ IL-29- |          |                  |          |            |          |
|-----------------------|----------|------------------|----------|------------|----------|
| Conditions            | p-values | Conditions       | p-values | Conditions | p-values |
| cont vs inf A549      | 0.01995  | cont vs inf Calu | 0.004845 | flu vs R/p | 0.2765   |
| cont vs SN A549       | 0.3721   | cont vs SN Calu  | 0.2592   | flu vs IMQ | 0.197    |
| inf vs SN A549        | 0.3721   | inf vs SN Calu   | 0.2592   | flu vs -   | 0.02494  |
|                       |          |                  |          | R/p vs IMQ | 0.9973   |
|                       |          |                  |          | R/p vs -   | 0.6853   |
|                       |          |                  |          | IMQ vs -   | 0.8      |
| Fig. 4e IFN-α+ IL-29+ |          |                  |          |            |          |
| Conditions            | p-values | Conditions       | p-values | Conditions | p-values |
| cont vs inf A549      | 0.01995  | cont vs inf Calu | 0.004845 | flu vs R/p | 0.197    |
| cont vs SN A549       | 0.3721   | cont vs SN Calu  | 0.2592   | flu vs IMQ | 0.2592   |
| inf vs SN A549        | 0.3721   | inf vs SN Calu   | 0.2592   | flu vs -   | 0.02775  |
|                       |          |                  |          | R/p vs IMQ | 0.9986   |
|                       |          |                  |          | R/p vs -   | 0.8206   |
|                       |          |                  |          | IMQ vs -   | 0.7332   |
| Fig. 4e IFN-α- IL-29+ |          |                  |          |            |          |
| Conditions            | p-values | Conditions       | p-values | Conditions | p-values |
| cont vs inf A549      | NS       | cont vs inf Calu | NS       | flu vs R/p | NS       |
| cont vs SN A549       | NS       | cont vs SN Calu  | NS       | flu vs IMQ | NS       |
| inf vs SN A549        | NS       | inf vs SN Calu   | NS       | flu vs -   | NS       |
|                       |          |                  |          | R/p vs IMQ | NS       |
|                       |          |                  |          | R/p vs -   | NS       |
|                       |          |                  |          | IMQ vs -   | NS       |

| Supplementary Fig. 3d CD2 <sup>hi</sup> CD5 <sup>+</sup> Axl <sup>+</sup> |          |                  |          |               |          |
|---------------------------------------------------------------------------|----------|------------------|----------|---------------|----------|
| Conditions                                                                | p-values | Conditions       | p-values | Conditions    | p-values |
| cont vs inf A549                                                          | 0.03784  | cont vs inf Calu | 0.09847  | flu vs piC    | NS       |
| cont vs SN A549                                                           | 0.06228  | cont vs SN Calu  | 0.02209  | flu vs IMQ    | NS       |
| inf vs SN A549                                                            | 0.979    | inf vs SN Calu   | 0.8264   | flu vs medium | NS       |
|                                                                           |          |                  |          | piC vs IMQ    | NS       |
|                                                                           |          |                  |          | piC vs medium | NS       |
|                                                                           |          |                  |          | IMQ vs medium | NS       |

| Supplementary Fig. 3d CD2 <sup>hi</sup> CD5 <sup>-</sup> Axl <sup>-</sup> |          |                  |          |               |          |
|---------------------------------------------------------------------------|----------|------------------|----------|---------------|----------|
| Conditions                                                                | p-values | Conditions       | p-values | Conditions    | p-values |
| cont vs inf A549                                                          | 0.01663  | cont vs inf Calu | NS       | flu vs piC    | NS       |
| cont vs SN A549                                                           | 0.122    | cont vs SN Calu  | NS       | flu vs IMQ    | NS       |
| inf vs SN A549                                                            | 0.7126   | inf vs SN Calu   | NS       | flu vs medium | NS       |
|                                                                           |          |                  |          | piC vs IMQ    | NS       |
|                                                                           |          |                  |          | piC vs medium | NS       |
|                                                                           |          |                  |          | IMQ vs medium | NS       |

**Supplementary Fig. 8. Exact p-values obtained from the statistical analyses.** All exact p-value are presented for each individual panel of Fig. 1, 3 and 4; Supplementary Fig. 3.

**Supplementary Table 1. Viral load and cytokinic profiles of SARS-CoV-2 infected patients with mild/asymptomatic and severe/critically-ill COVID-19.** Viral load in nasal swab determined by qPCR relative to the volume and number of cells. Abbreviations: ND ; not detected, / ; not determined.

| group: mild/asymptomatic patients |                  |            |             |                                    |              |                                          |           |                |              |               |
|-----------------------------------|------------------|------------|-------------|------------------------------------|--------------|------------------------------------------|-----------|----------------|--------------|---------------|
| ID                                | day post symptom | Viral load |             |                                    |              | Cytokinic level in the blood of patients |           |                |              |               |
|                                   |                  | Ct SARS N  | log10 cp/ml | log10 copies /10 <sup>3</sup> cell | Results      | IFN-α (fg/mL)                            | IFN score | IFN-λ1 (pg/mL) | IL-6 (pg/mL) | IFN-γ (pg/mL) |
| P41-01                            | 4                | 18.81      | 7.11        | 5.1                                | Positive     | 5919.0                                   | 149.96    | 38.26          | /            | 41.17         |
| P41-02                            | 11               | 27.56      | 4.62        | 2.7                                | Positive     | 2267.0                                   | 71.71     | 15.64          | /            | 149.17        |
| P41-03                            | 18               | 34.16      | 2.45        | 0.6                                | Positive     | 6.6                                      | 2.61      | 7.76           | 0.48         | 13.87         |
| P41-04                            | 25               | 37.23      | 0.00        | ND                                 | Positive     | /                                        | 1.56      | 2.90           | 0.27         | 9.98          |
| G38-01                            | 1                | 23.37      | 5.72        | 3.4                                | Positive     | 7382.0                                   | 26.39     | 40.91          | /            | 31.55         |
| G38-02                            | 8                | 23.22      | 6.00        | 3.9                                | Positive     | 53.3                                     | 2.8       | 6.24           | /            | 11.65         |
| G38-03                            | 15               | 29.95      | 3.96        | 1.6                                | Positive     | 0.0                                      | 2.35      | 8.82           | 1.56         | 9.85          |
| G38-04                            | 22               | 23.3       | 5.73        | 3.8                                | Positive     | /                                        | ND        | 0.85           | 0.90         | 4.84          |
| G17-01                            | 4                | 21.65      | 6.24        | 3.9                                | Positive     | 245.0                                    | 39.02     | 7.60           | /            | 151.88        |
| G17-02                            | 10               | /          | /           | /                                  | /            | 9.2                                      | 4.46      | 9.23           | /            | 15.36         |
| G17-03                            | 19               | /          | /           | /                                  | /            | 0.0                                      | 3.36      | 3.37           | 0.23         | 94.97         |
| G17-04                            | 25               | /          | /           | /                                  | /            | /                                        | 1.86      | 0.85           | 0.90         | 4.84          |
| G17-05                            | 183              | /          | /           | /                                  | /            | /                                        | /         | 2.19           | 0.71         | 13.85         |
| A30-01                            | 1                | 23.53      | 5.67        | 4.2                                | Positive     | 3683.0                                   | 123.66    | 8.83           | 1.06         | 13.78         |
| A30-02                            | 8                | 26.59      | 4.79        | 2.8                                | Positive     | 173.2                                    | 27.65     | 4.32           | 0.60         | 13.46         |
| A30-03                            | 14               | ND         | 1.65        | -0.5                               | Positive low | 0.0                                      | 1.41      | 2.16           | 0.33         | 5.61          |
| A30-04                            | 22               | ND         | ND          | ND                                 | Negative     | ND                                       | 1.68      | 2.67           | 0.76         | 6.45          |
| A30-05                            | 183              | /          | /           | /                                  | /            | /                                        | /         | 1.84           | 0.24         | 3.47          |
| L175-01                           | 1                | 16.73      | 7.6         | 6.8                                | Positif      | 2.9                                      | 173.9     | 24.17          | 0.64         | 108.69        |
| L175-02                           | 8                | /          | /           | /                                  | /            | 25.2                                     | 18.27     | 3.58           | 0.47         | 18.12         |
| L175-03                           | 13               | 38.55      | 0.87        | ND                                 | Positive low | /                                        | 3.71      | 2.14           | 0.32         | 8.75          |
| L175-04                           | 20               | /          | /           | /                                  | /            | /                                        | 2.74      | 2.01           | 0.27         | 9.73          |
| L175-05                           | 183              | /          | /           | /                                  | /            | /                                        | /         | 1.89           | 0.32         | 7.71          |
| P29-01                            | 2                | 22.73      | 5.91        | 3.9                                | Positive     | 774.0                                    | 76.76     | 9.04           | /            | 203.40        |
| P29-02                            | 9                | /          | /           | /                                  | /            | 4.2                                      | 2.63      | 3.79           | /            | 9.27          |
| P29-03                            | 16               | /          | /           | /                                  | /            | 1.4                                      | 2.3       | 1.97           | 0.39         | 13.34         |
| P29-04                            | 23               | /          | /           | /                                  | /            | /                                        | 2.07      | /              | /            | /             |
| P29-05                            | 30               | /          | /           | /                                  | /            | /                                        | /         | 2.32           | 0.27         | 7.88          |
| P29-06                            | 183              | /          | /           | /                                  | /            | /                                        | /         | 2.72           | 0.30         | 11.62         |
| group: severe patients            |                  |            |             |                                    |              |                                          |           |                |              |               |
| ID                                | day post symptom | Viral load |             |                                    |              | Cytokinic level in the blood of patients |           |                |              |               |
|                                   |                  | Ct SARS N  | log10 cp/ml | log10 copies /10 <sup>3</sup> cell | Results      | IFN-α (fg/mL)                            | IFN score | IFN-λ1 (pg/mL) | IL-6 (pg/mL) | IFN-γ (pg/mL) |
| C-01                              | 27               | 30.8       | /           | /                                  | Positive     | 22.4                                     | 0.9       | 3.69           | 11.09        | ND            |
| C-02                              | 37               | ND         | /           | /                                  | Negative     | 13.3                                     | < 0.4     | 1.34           | 0.86         | 4.59          |
| B-01                              | 9                | /          | /           | /                                  | Positive     | 0.0                                      | 2.7       | 21.99          | /            | 48.12         |
| B-02                              | 11               | /          | /           | /                                  | Positive     | 0.0                                      | 0.6       | 14.29          | /            | 11.37         |
| B-03                              | 15               | /          | /           | /                                  | Positive     | 0.0                                      | 0.8       | 12.76          | /            | 5.07          |
| H-01                              | 15               | 25.5       | /           | /                                  | Positive     | 0.0                                      | 0.5       | 9.00           | 107.49       | 15.27         |
| H-02                              | 18               | pos        | /           | /                                  | Positive     | 28.0                                     | 1         | 7.83           | 138.92       | 8.82          |
| H-03                              | 20               | pos        | /           | /                                  | Positive     | 16.7                                     | 0.9       | 6.02           | 260.51       | 79.26         |
| F-01                              | 12               | 35.7       | /           | /                                  | Positive     | 0.8                                      | 2.37      | /              | /            | /             |
| F-02                              | 28               | ND         | /           | /                                  | Negative     | 5.6                                      | 0.53      | /              | /            | /             |

|      |    |      |   |   |          |      |       |       |       |       |
|------|----|------|---|---|----------|------|-------|-------|-------|-------|
| F-03 | 35 | ND   | / | / | Negative | 0    | 0.39  | /     | /     | /     |
| O-01 | 8  | 19.7 | / | / | Positive | 1025 | 39.89 | /     | /     | /     |
| O-02 | 16 | 21.1 | / | / | Positive | 0    | 1.19  | 2.46  | 1.63  | 8.68  |
| O-03 | 23 | 32.7 | / | / | Positive | 0    | 1.53  | 7.90  | 6.31  | 39.75 |
| O-04 | 30 | ND   | / | / | Negatif  | 3.9  | 0.87  | 11.05 | 9.18  | 50.80 |
| R-01 | 36 | 32.1 | / | / | Positive | 7.5  | 1.1   | /     | /     | /     |
| R-02 | 43 | ND   | / | / | Negative | 7.3  | 0.74  | 3.02  | 18.83 | 7.36  |
| R-03 | 50 | ND   | / | / | Negative | 11   | 2.28  | 5.04  | 2.44  | 16.63 |

**Supplementary Table 2. Primer sequences for quantitative real-time PCR**

| Gene                            | Forward Primer        | Reverse Primer          |
|---------------------------------|-----------------------|-------------------------|
| <i>MXA</i>                      | ACAGGACCATCGGAATCTTG  | CCCTTCTTCAGGTGGAACAC    |
| <i>ISG15</i>                    | GACAAATGCGACGAACCTCT  | CGGCCCTTGTATTCCCTCA     |
| <i>IFN<math>\lambda</math>1</i> | TCCTAGACCAGCCCCTTCA   | GTGGGCTGAGGCTGGATA      |
| <i>IL6</i>                      | GTCAGGGGTGGTTATTGCAC  | AGTGAGGAACAAGCCAGAGC    |
| <i>TNF</i>                      | AGATGATCTGACTGCCTGGG  | CTGCTGCACTTTGGAGTGAT    |
| <i>GAPDH</i>                    | AGGTGAAGGTCGGAGTCAACG | TGGAAGATGGTGATGGGATTTTC |

**Supplementary Table 3: Regulation of the selected biomarkers by the IRF/IFN-I versus NF- $\kappa$ B pathways.** The identification of cis-acting regulatory elements in promoter of the set of analyzed markers was performed as described in the [Method section](#), using the FIMO and AME tools available on <https://meme-suite.org/meme/><sup>98,99</sup>. Additional searches were performed using website, as reference: <https://www.bu.edu/nf-kb/gene-resources/target-genes/> and <http://www.interferome.org/interferome/home.jsp> and the supplemental source/retrieved publications are indicated. The color-code corresponds to the number of cis-acting regulatory elements in each promoter. Abbreviations: ND; not determined. Of note, IRF7 and VAF transcription factors binds to *IFN $\alpha$*  and *IFN $\beta$*  promoter regions and induce the IFN $\alpha$  and IFN $\beta$  mRNA.

|                                  |                  | consensus sequence for regulators related to: |       |       |       |              |       |                |                                                                                                                                                                         |            |  |
|----------------------------------|------------------|-----------------------------------------------|-------|-------|-------|--------------|-------|----------------|-------------------------------------------------------------------------------------------------------------------------------------------------------------------------|------------|--|
|                                  |                  | IRF/IFN-I                                     |       |       |       |              |       | NF- $\kappa$ B |                                                                                                                                                                         |            |  |
| name in the text                 | Accession number | IRF 7                                         | IRF 3 | IRF 1 | IRF 5 | STAT1: STAT2 | IRF 9 | IRF 8          | https://www.bu.edu/nf-kb/gene-resources/target-genes/ and http://www.interferome.org/interferome/home.jsp                                                               | references |  |
| <i>IFN<math>\alpha</math>1</i>   | NM_024013.3      | 2                                             | 2     | 6     | 0     | 0            | 0     | 0              | N.D for NF- $\kappa$ B                                                                                                                                                  |            |  |
| <i>IFN<math>\alpha</math>2</i>   | NM_000605.4      | 0                                             | 0     | 1     | 0     | 0            | 0     | 0              | N.D for NF- $\kappa$ B                                                                                                                                                  | 100        |  |
| <i>IFN<math>\alpha</math>4</i>   | NM_021068.3      | 0                                             | 0     | 3     | 0     | 0            | 0     | 0              | N.D for NF- $\kappa$ B                                                                                                                                                  | 100        |  |
| <i>IFN<math>\beta</math>1</i>    | NM_002176.4      | 1                                             | 2     | 2     | 1     | 1            | 0     | 0              | *not directly demonstrated - likely for B lymphocytes and fibroblasts                                                                                                   | 101,102    |  |
| <i>ISG15</i>                     | NM_005101.4      | 1                                             | 5     | 6     | 2     | 4            | 4     | 2              | N.D for NF- $\kappa$ B                                                                                                                                                  |            |  |
| <i>MxA*</i>                      | NM_001144925.2   | 1                                             | 3     | 4     | 4     | 7            | 2     | 1              | * $\kappa$ B site in the promoter but has not been shown to be controlled by NF- $\kappa$ B or the gene expression is associated with increased NF- $\kappa$ B activity | 103        |  |
| <i>IFN<math>\lambda</math>1</i>  | NM_172140.2      | 1                                             | 2     | 2     | 0     | 1            | 2     | 0              | N.D for NF- $\kappa$ B                                                                                                                                                  |            |  |
| <i>IL28A</i>                     | NM_172138.2      | 1                                             | 1     | 4     | 1     | 1            | 0     | 0              | N.D for NF- $\kappa$ B                                                                                                                                                  |            |  |
| <i>IFN<math>\lambda</math>3</i>  | NM_001346937.2   | 1                                             | 2     | 2     | 1     | 2            | 0     | 0              | N.D for NF- $\kappa$ B                                                                                                                                                  |            |  |
| <i>CD70</i>                      | NM_001252.5      | 0                                             | 0     | 1     | 0     | 0            | 0     | 0              | NF- $\kappa$ B site: NFKAPPAB & NFKAPPAB50                                                                                                                              |            |  |
| <i>CD83</i>                      | NM_001040280.3   | 0                                             | 0     | 0     | 0     | 0            | 0     | 0              | Target Genes of NF- $\kappa$ B                                                                                                                                          | 45,104     |  |
| <i>TRAIL</i>                     | NM_003810.4      | 0                                             | 2     | 4     | 0     | 2            | 0     | 0              | Target Genes of NF- $\kappa$ B                                                                                                                                          | 105,106    |  |
| <i>TNF</i>                       | NM_000594.4      | 0                                             | 2     | 1     | 1     | 1            | 1     | 1              | Target Genes of NF- $\kappa$ B                                                                                                                                          | 107,108    |  |
| <i>HLA-DR<math>\alpha</math></i> | NM_019111.5      | 0                                             | 0     | 1     | 0     | 0            | 1     | 1              | N.D for NF- $\kappa$ B                                                                                                                                                  |            |  |
| <i>IL6</i>                       | NM_001371096.1   | 1                                             | 0     | 3     | 1     | 0            | 1     | 0              | Target Genes of NF- $\kappa$ B                                                                                                                                          | 109-111    |  |
| <i>CD80</i>                      | NM_005191.4      | 0                                             | 0     | 2     | 0     | 0            | 0     | 0              | Target Genes of NF- $\kappa$ B                                                                                                                                          | 112,113    |  |
| <i>PD-L1 (CD274 B7-H1)</i>       | NM_014143.4      | 3                                             | 2     | 2     | 1     | 3            | 2     | 1              | Target Genes of NF- $\kappa$ B                                                                                                                                          | 46,114     |  |

**Supplementary Table 4. List of reagents and biological tools used for the methods.** This includes antibodies, dyes and staining solutions; virus/strains; chemicals, peptides, recombinant proteins; critical commercial assays; cell lines; and recombinant DNA.

| REAGENT or RESOURCE                                           | SOURCE            | IDENTIFIER                        | CONCENTRATION or DILUTION (when concentration unknown) | Application              | Validation                                                     |
|---------------------------------------------------------------|-------------------|-----------------------------------|--------------------------------------------------------|--------------------------|----------------------------------------------------------------|
| Antibodies                                                    |                   |                                   |                                                        |                          |                                                                |
| mouse anti-human CD2 Bv785-conjugated (clone RPA-2.10)        | BioLegend         | Cat# 300234, RRID:AB_2800717      | 2.5 µg/mL                                              | flow cytometry           | manufacturer's information                                     |
| mouse anti-human CD5 A700-conjugated (clone UCHT2 )           | BioLegend         | Cat# 300632, RRID:AB_2632671      | 1.25 µg/mL                                             |                          |                                                                |
| mouse anti-human CD70 PE/Dazzle594-conjugated (clone 113-16)  | BioLegend         | Cat# 355123, RRID:AB_2820005      | 3.33 µg/mL                                             |                          |                                                                |
| mouse anti-human CD80 APC-H7-conjugated (clone L307.4)        | BD Biosciences    | Cat# 561134, RRID:AB_10565974     | 10-fold dilution                                       |                          |                                                                |
| mouse anti-human CD83 PE/Dazzle594-conjugated (clone HB15e)   | BioLegend         | Cat# 305328, RRID:AB_2564260      | 10 µg/mL                                               |                          |                                                                |
| mouse anti-human CD123 Bv711-conjugated (clone 6H6)           | BioLegend         | Cat# 306030, RRID:AB_2566354      | 5 µg/mL                                                |                          |                                                                |
| mouse anti-human CD274/PE-Cy7-conjugated (clone MIH1)         | BD Biosciences    | Cat# 558017, RRID:AB_396986       | 10 µg/mL                                               |                          |                                                                |
| mouse anti-human CD303 Bv421-conjugated (clone 201A)          | BioLegend         | Cat# 354212, RRID:AB_2563871      | 10 µg/mL                                               |                          |                                                                |
| mouse anti-human HLA-DR Bv510-conjugated (clone L243)         | BioLegend         | Cat# 307646, RRID:AB_2561948      | 1.2 µg/mL                                              |                          |                                                                |
| mouse anti-human TNF PE-conjugated (clone MAb11)              | BioLegend         | Cat# 502909, RRID:AB_315261       | 10 µg/mL                                               |                          |                                                                |
| mouse anti-human TRAIL PE-conjugated (clone RIK-2 )           | BioLegend         | Cat# 308205, RRID:AB_345291       | 10 µg/mL                                               |                          |                                                                |
| mouse anti-human IFN-α APC-conjugated (clone LT27:295)        | Miltenyi Biotec   | Cat# 130-092-602, RRID:AB_871558  | 10-fold dilution                                       |                          |                                                                |
| mouse anti-human IL-29 (IFN-λ1) purified (Clone 247801)       | R & D Systems     | Cat# MAB15981, RRID:AB_2125340    | 200 µg/mL                                              |                          |                                                                |
| mouse anti-human AXL A488-conjugated (clone 108724R)          | R & D Systems     | Cat# FAB154RG                     | 10 µg/mL                                               |                          |                                                                |
| mouse anti-human CD123 PE or APC-conjugated (clone AC145)     | Miltenyi          | Cat# 130-090-901, RRID:AB_244209  | 20-fold dilution                                       |                          |                                                                |
| mouse anti-human BDCA-2 APC-conjugated (clone AC144)          | Miltenyi          | Cat# 130-090-905, RRID:AB_244165  | 20-fold dilution                                       |                          |                                                                |
| mouse anti-human CD11c BV605-conjugated (clone B-ly6)         | BD Horizon        | Cat# 563929, RRID:AB_2744276      | 50-fold dilution                                       |                          |                                                                |
| mouse anti-human CD56/NCAM FITC-conjugated (clone TULY56)     | eBioscience       | Cat# 11-0566-42, RRID:AB_2572459  | 5 µg/mL                                                |                          |                                                                |
| mouse anti-human HLA-DR BV711-conjugated (clone L243)         | BioLegend         | Cat# 307644, RRID:AB_2562913      | 1 µg/mL                                                |                          |                                                                |
| mouse anti-human IL-6 PE-conjugated (clone MQ2-13A5)          | BioLegend         | Cat# 501107, RRID:AB_315155       | 2.5 µg/mL                                              |                          |                                                                |
| mouse anti-human CD14 BV785-conjugated (clone M5E2 )          | BioLegend         | Cat# 301840, RRID:AB_2563425      | 5 µg/mL                                                |                          |                                                                |
| mouse anti-human CD14 FITC-conjugated (clone M5E2)            | BD Pharmingen     | Cat# 555397, RRID:AB_395798       | 20-fold dilution                                       |                          |                                                                |
| mouse anti-human CD141 PerCP/Cy5.5-conjugated (clone M80)     | BioLegend         | Cat# 344112, RRID:AB_2561625      | 20 µg/mL                                               |                          |                                                                |
| mouse anti-human CD16 FITC-conjugated (clone B73.1)           | BioLegend         | Cat# 360716, RRID:AB_2563071      | 20 µg/mL                                               |                          |                                                                |
| mouse anti-human CD16 PacificBlue-conjugated (clone 3G8)      | BioLegend         | Cat# 302032, RRID:AB_2104003      | 10 µg/mL                                               |                          |                                                                |
| mouse anti-human CD19 FITC-conjugated (clone HIB19)           | eBioscience       | Cat# 11-0199-42, RRID:AB_10669461 | 10 µg/mL                                               |                          |                                                                |
| mouse anti-human CD1c PerCP-eFluor710-conjugated (clone L161) | eBioscience       | Cat# 46-0015-42, RRID:AB_10548936 | 1.2 µg/mL                                              |                          |                                                                |
| mouse anti-human CD20 FITC-conjugated (clone 2H7)             | BD Pharmingen     | Cat# 555622, RRID:AB_395988       | 20-fold dilution                                       |                          |                                                                |
| mouse anti-human CD3 FITC-conjugated (clone UCHT1)            | eBioscience       | Cat# 11-0038-42, RRID:AB_2043831  | 10 µg/mL                                               |                          |                                                                |
| mouse anti-dsRNA unconjugated (clone J2 IgG2a)                | SCICONS           | Cat# 10010200, RRID:AB_2651015    | 10 µg/mL                                               | flow cytometry & imaging | validated by serial dilution - uninfected cells as neg control |
| rabbit anti-SARS-CoV-2 Spike S2 unconjugated (polyclonal)     | Sino Biological   | 40590-T62-100                     | 200-fold dilution                                      | flow cytometry & imaging | validated by serial dilution - uninfected cells as neg control |
| mouse anti-human integrin αL subunit unconjugated (clone 38)  | antibodies online | Cat# ABIN375486, RRID:AB_10782956 | 10 µg/mL                                               | coculture                | validated by serial dilution, no pDC as neg control            |
| mouse anti-human ICAM-1 unconjugated (clone LB-2)             | BD Pharmingen     | Cat# 559047, RRID:AB_397183       | 10 µg/mL                                               | coculture                | validated by serial dilution, no pDC as neg control            |
| goat anti-Rabbit IgG (H+L) AlexaFluor 546-conjugated          | Invitrogen        | Cat# A-11035, RRID:AB_143051      | 2 µg/mL                                                | flow cytometry & imaging | manufacturer's information                                     |
| goat anti-Rabbit IgG (H+L) AlexaFluor 647-conjugated          | Invitrogen        | Cat# A-31573, RRID:AB_2536183     | 2 µg/mL                                                |                          |                                                                |
| goat anti-mouse IgG (H+L) AlexaFluor 555-conjugated           | Invitrogen        | Cat# A32727, RRID:AB_2536164      | 2 µg/mL                                                |                          |                                                                |
| Dyes and staining solutions                                   |                   |                                   |                                                        |                          |                                                                |
| human TruStain FcX (Fc receptor blocking solution)            | BioLegend         | Cat# 422302, RRID:AB_2818986      | N.A.                                                   | flow cytometry           | manufacturer's information                                     |
| BD Cytotfix/Cytoperm Plus Kit (with BD GolgiPlug)             | BD Biosciences    | Cat# 555028                       | N.A.                                                   |                          |                                                                |
| ZombieAqua fixable viability kit                              | BioLegend         | Cat# 423101                       | 1000-fold dilution                                     |                          |                                                                |
| ZombieGreen fixable viability kit                             | BioLegend         | Cat# 423111                       | 1000-fold dilution                                     |                          |                                                                |
| Fixable viability dye eFluor450                               | eBioscience       | Cat# 65-0863-14                   | 1000-fold dilution                                     |                          |                                                                |
| FITC Annexin V Apoptosis Detection Kit with 7-AAD             | BioLegend         | Cat#640922                        | N.A.                                                   |                          |                                                                |

|                                                                              |                                                                                    |                                                                               |                      |                                            |                              |      |
|------------------------------------------------------------------------------|------------------------------------------------------------------------------------|-------------------------------------------------------------------------------|----------------------|--------------------------------------------|------------------------------|------|
| Mix-n-Stain CF568 Dye Antibody Labeling Kit                                  | Biotium                                                                            | Cat# 92235                                                                    | N.A.                 |                                            |                              |      |
| LIVE/DEAD Fixable Near-IR Dead Cell Stain Kit                                | Life Technologies                                                                  | Cat# L10119                                                                   | 1000-fold dilution   | Live imaging                               | manufacturer's information   |      |
| vybrant cell-labeling solution (CM-Dil)                                      | Life Technologies                                                                  | Cat# V22888, CAS:180854-97-1                                                  | 1000-fold dilution   |                                            |                              |      |
| celltrace Violet cell Proliferation kit (CTV)                                | Life Technologies                                                                  | Cat# C34557                                                                   | 1000-fold dilution   |                                            |                              |      |
| Virus / strains                                                              |                                                                                    |                                                                               |                      |                                            |                              |      |
| SARS-CoV-2 clinical isolate                                                  | GISAID EpiCoV database: BetaCoV/France/IDF0571/2020 ; accession ID: EPI_ISL_411218 | N/A                                                                           | N.A.                 | flow cytometry, imaging, coculture         |                              |      |
| icSARS-CoV-2-mNG (Wuhan)                                                     | kindly provided by Dr Pei-Yong Shi                                                 | N/A                                                                           | N.A.                 |                                            |                              |      |
| Influenza A Virus (Flu A/H1N1/New caledonia)                                 | kindly provided by Dr V. Lotteau (CIRI, Lyon, France)                              | N/A                                                                           | N.A.                 |                                            |                              |      |
| Chemicals, Peptides, and Recombinant Proteins                                |                                                                                    |                                                                               |                      |                                            |                              |      |
| Arp2/3 complex inhibitor I (CK-666)                                          | Merck Millipore                                                                    | Cat# 182515, CAS:442633-00-3                                                  | see in Figure Legend | coculture                                  | validated by serial dilution |      |
| Imiquimod                                                                    | Invivogen                                                                          | Cat# tlr-imqs, CAS:99011-78-6                                                 | 20 µM                |                                            |                              |      |
| polyICLMW                                                                    | Invivogen                                                                          | Cat# tlr-picw, CAS : 31852-29-6                                               | 42.22 µM             |                                            |                              |      |
| R848                                                                         | Invivogen                                                                          | Cat# vac-r848, CAS : 144875-48-9                                              | 31.8 µM              |                                            |                              |      |
| IRS661 (5'-TGCTTGCAAGCTTGAAGCA-3')                                           | N.A.                                                                               | synthesized on phosphorothioate backbone                                      | see in Figure Legend |                                            |                              |      |
| poly-L-lysine (P6282)                                                        | Sigma-Aldrich                                                                      | Cat# P6282, CAS:25988-63-0                                                    | N.A.                 | Live imaging                               | N.A.                         |      |
| Dulbecco's modified Eagle medium / Nutrient Mixture F-12 Ham (DMEM/F-12 1:1) | Life Technologies                                                                  | Cat# 31331028                                                                 | N.A.                 | coculture                                  | manufacturer's information   |      |
| RPMI 1640 Medium                                                             | Life Technologies                                                                  | Cat# 31870025                                                                 | N.A.                 |                                            |                              |      |
| Dulbecco's modified Eagle medium (DMEM)                                      | Life Technologies                                                                  | Cat# 41966029                                                                 | N.A.                 |                                            |                              |      |
| Penicillin-Streptomycin                                                      | Life Technologies                                                                  | Cat# 15140122                                                                 | 100 U/ml             |                                            |                              |      |
| L-Glutamine                                                                  | Life Technologies                                                                  | Cat# 25030024                                                                 | 2 mM                 |                                            |                              |      |
| Non-Essential Amino Acids Solution                                           | Life Technologies                                                                  | Cat# 11140035                                                                 | N.A.                 |                                            |                              |      |
| Sodium Pyruvate                                                              | Life Technologies                                                                  | Cat# 11360039                                                                 | 1 mM                 |                                            |                              |      |
| Hepes                                                                        | Life Technologies                                                                  | Cat# 15630056                                                                 | 10 mM                |                                            |                              |      |
| Trypsin-EDTA (0.05%), phenol red                                             | Life Technologies                                                                  | Cat# 25300054                                                                 | N.A.                 |                                            |                              | N.A. |
| EDTA                                                                         | Life Technologies                                                                  | Cat# 15575038                                                                 | 0.48 mM              |                                            |                              | N.A. |
| DMSO                                                                         | Sigma-Aldrich                                                                      | Cat# D2438, CAS: 67-68-5                                                      | 10% final volume     | N.A.                                       |                              |      |
| Critical Commercial Assays                                                   |                                                                                    |                                                                               |                      |                                            |                              |      |
| BDCA-4-magnetic beads                                                        | Miltenyi                                                                           | Cat# 130-090-532                                                              | N.A.                 | N.A.                                       | manufacturer's information   |      |
| VeriKine Human Interferon Alpha Multi-Subtype ELISA Kit                      | PBL Interferon Source                                                              | Cat# 41105-2                                                                  | N.A.                 | N.A.                                       |                              |      |
| IFN-lambda ELISA                                                             | PBL Interferon Source                                                              | Cat# 61840-1                                                                  | N.A.                 | N.A.                                       |                              |      |
| VeriKine Human Interferon Beta ELISA Kit                                     | PBL Interferon Source                                                              | Cat# 41410-1                                                                  | N.A.                 | N.A.                                       |                              |      |
| High-Capacity cDNA Reverse Transcription Kit                                 | Life Technologies                                                                  | Cat# 4368813                                                                  | N.A.                 | N.A.                                       | N.A.                         |      |
| PowerUp SYBR Green Master Mix                                                | Life Technologies                                                                  | Cat# A25742                                                                   | N.A.                 | N.A.                                       | N.A.                         |      |
| Simoa IFN-α Reagent Kit                                                      | Quanterix                                                                          | Cat# 100860                                                                   | N.A.                 | N.A.                                       | N.A.                         |      |
| Cell lines                                                                   |                                                                                    |                                                                               |                      |                                            |                              |      |
| A549 cell line                                                               | ATCC                                                                               | CCL-185                                                                       |                      | N.A.                                       |                              |      |
| Calu-3 cell line                                                             | ATCC                                                                               | HTB-55                                                                        |                      | N.A.                                       |                              |      |
| NCI-H358 cell line                                                           | ATCC                                                                               | CRL-5807                                                                      |                      | N.A.                                       |                              |      |
| 293T cell line                                                               | ATCC                                                                               | CRL-3216                                                                      |                      | N.A.                                       |                              |      |
| Human hepatoma cell line                                                     | Nakabayashi et al., 1982                                                           | Huh-7.5.1 (RRID:CVCL_E049)                                                    |                      | N.A.                                       |                              |      |
| Vero cell line (clone Vero E6)                                               | Dr Bouloy; Institut Pasteur, France                                                | CRL-1586, ATCC                                                                |                      | N.A.                                       |                              |      |
| Recombinant DNA                                                              |                                                                                    |                                                                               |                      |                                            |                              |      |
| lentivirus-based vector expressing ACE2                                      | Dr C. Goujon, IRIM, France                                                         | <a href="https://www.addgene.org/145839/">https://www.addgene.org/145839/</a> |                      | RRL.sin.cPPT.SFFV/Ace2.IRES-puromycin.WPRE |                              |      |
